# Supplementary material
Source: PubMed Central journal article supplement (PMC7760471)
Supplement: oc0c01189_si_001.pdf [file oc0c01189_si_001.pdf]

## Supplementary Information (SI)

### **Rapid and Accurate Visualization of Breast Tumors with a Fluorescent Probe Targeting $\alpha$ -Mannosidase 2C1**

Kyohhei Fujita<sup>1</sup>, Mako Kamiya<sup>1,3</sup>, Takafusa Yoshioka<sup>1</sup>, Akira Ogasawara<sup>2</sup>, Rumi Hino<sup>4</sup>,  
Ryosuke Kojima<sup>1,3</sup>, Hiroaki Ueo<sup>5</sup> and Yasuteru Urano<sup>\*1,2,6</sup>

<sup>1</sup>Graduate School of Medicine and <sup>2</sup>Graduate School of Pharmaceutical Sciences, The University of Tokyo, 7-3-1 Hongo, Bunkyo-ku, Tokyo 113-0033, Japan. <sup>3</sup>PRESTO, Japan Science and Technology Agency, 4-1-8 Honcho, Kawaguchi, Saitama 332-0012, Japan. <sup>4</sup>Daito Bunka University, Department of Sports and Health Science, 560 Iwadono, Higashimathuyama, Saitama, 355-8501, Japan. <sup>5</sup>Ueo Breast Cancer Hospital, Oita, 870-0854, Japan. <sup>6</sup>CREST, Japan Agency for Medical Research and Development, 1-7-1 Otemachi, Chiyoda-ku, Tokyo 100-0004, Japan.

\*e-mail [uranokun@m.u-tokyo.ac.jp](mailto:uranokun@m.u-tokyo.ac.jp)

## Table of Contents

|                                                                                                                                                                                       |         |
|---------------------------------------------------------------------------------------------------------------------------------------------------------------------------------------|---------|
| <b>Experimental details</b> .....                                                                                                                                                     | S4-S5   |
| <b>Figure S1.</b> $\gamma$ -Glutamyltranspeptidase (GGT)-reactive fluorescent probe, gGlu-HMRG. ....                                                                                  | S6      |
| <b>Figure S2.</b> Heat map of intact glycosidase activities in various living cancer cell lines. ....                                                                                 | S6      |
| <b>Figure S3.</b> Confocal images of fluorescence intensity in MCF7 cells treated with each glycosidase-reactive probe in the presence and absence of inhibitor. ....                 | S7      |
| <b>Figure S4.</b> Confocal images of fluorescence intensity in MCF7 cells treated with HMRef- $\alpha$ Man in the presence and absence of 4 inhibitors of $\alpha$ -mannosidase. .... | S8      |
| <b>Figure S5.</b> Inhibition of $\alpha$ -mannosidase activity by swainsonine in 4 breast cancer cell lines. ....                                                                     | S9      |
| <b>Figure S6.</b> Example of screening using surgically resected normal and IDC tissues from human breast. ..                                                                         | S10     |
| <b>Figure S7.</b> Time-dependent fluorescence increase of each probe in breast cancer tissues. ....                                                                                   | S11     |
| <b>Table S1.</b> Detection of breast cancer with each fluorescent probe. ....                                                                                                         | S12     |
| <b>Figure S8.</b> ROC curves and Sensitivity-Specificity plots for breast cancer detection. ....                                                                                      | S12     |
| <b>Figure S9.</b> A novel fluorescent probe for $\alpha$ -mannosidase activity. ....                                                                                                  | S13     |
| <b>Figure S10.</b> DEG assay using HMRef- $\alpha$ Man with surgically resected IDC and FA specimens from human breast. ....                                                          | S14     |
| <b>Table S2.</b> List of detected proteins in DEG assay of a human IDC surgical specimen. ....                                                                                        | S15-S17 |
| <b>Figure S11.</b> Evaluation of probe HMRef- $\alpha$ Man in surgically resected fresh normal and FA tissues from human breast. ....                                                 | S18     |
| <b>Figure S12.</b> Evaluation of probe HMRef- $\alpha$ Man in surgically resected fresh PT and ICP tissues from human breast. ....                                                    | S19     |
| <b>Figure S13.</b> ROC curves and Sensitivity-Specificity plots for FA detection. ....                                                                                                | S20     |
| <b>Table S3.</b> List of detected proteins in DEG assay of a human FA surgical specimen. ....                                                                                         | S21-S22 |
| <b>Figure S14.</b> Comparison of fluorescence increase in normal, cancer and FA (benign) breast specimens. ..                                                                         | S23     |
| <b>Figure S15.</b> Example of screening with surgically resected normal and FA tissues from human breast. ..                                                                          | S24     |

|                                                                                                                                                                                                               |         |
|---------------------------------------------------------------------------------------------------------------------------------------------------------------------------------------------------------------|---------|
| <b>Figure S16.</b> ROC curve and sensitivity-specificity plot for binary classification (cancer/FA) by HMRef- $\alpha$ Man. ....                                                                              | S25     |
| <b>Figure S17.</b> Fluorescence increases of gGlu-HMRG in normal, cancer (IDC and DCIS) and benign (FA) tissues from human breast. ....                                                                       | S25     |
| <b>Figure S18.</b> Red fluorescent probe for GGT activity. ....                                                                                                                                               | S26     |
| <b>Figure S19.</b> Time-dependent fluorescence images of human normal, cancer and benign (FA) tissues from human breast after administration of HMRef- $\alpha$ Man and gGlu-2OMe SiR600. ....                | S27     |
| <b>Figure S20.</b> Time-dependent fluorescence images at 540 nm and 640 nm of normal, cancer and benign (FA) tissues from human breast after administration of HMRef- $\alpha$ Man and gGlu-2OMe SiR600. .... | S28     |
| <b>Figure S21.</b> Fluorescence increase of breast cancer and normal tissues in the presence of HMRef or HMRef- $\alpha$ Man. ....                                                                            | S29     |
| <b>Figure S22.</b> MAN2C1 attenuates PTEN function. ....                                                                                                                                                      | S30     |
| <b>Figure S23.</b> H.E and IHC staining of DCIS tissue from 8 different patients. ....                                                                                                                        | S31     |
| <b>Figure S24.</b> IHC staining of benign FA and cancer tissues. ....                                                                                                                                         | S32     |
| <b>Organic synthesis and characterization of compounds</b> .....                                                                                                                                              | S33-S45 |
| <b>References</b> .....                                                                                                                                                                                       | S46     |

**Optical properties of probes.** Ultraviolet-visible spectra were obtained on a V-2450 spectrometer (Shimadzu Corporation) and fluorescence spectra were obtained on a F-7000 fluorescence spectrometer (Hitachi High-Technologies Corporation). Probes were dissolved in dimethyl sulfoxide (DMSO) to obtain stock solutions. Optical properties of probes were examined in PBS containing 0.1% DMSO *v/v* as a co-solvent (**Figures S6 and S17**).

**Measurement of  $\alpha$ -mannosidase activity *in vitro*.** The time course of fluorescence intensity of HMRef- $\alpha$ Man was monitored at excitation/emission wavelengths of 498 nm/540 nm on a F-7000 fluorescence spectrometer (Hitachi High-Technologies Corporation). To a 10  $\mu$ M solution of HMRef- $\alpha$ Man in 3 mL of PBS (-), pH 7.4, containing 0.1% DMSO as a cosolvent,  $\alpha$ -mannosidase (SIGMA M7257, 2.4 units) was added at 150 s. The gray line (control) shows the fluorescence change in the absence of  $\alpha$ -mannosidase (**Figure S6**).

**Measurement of GGT activity *in vitro*.** The time course of fluorescence intensity of gGlu-2OMe SiR600 was monitored at excitation/emission wavelengths of 595 nm/615 nm on a F-7000 fluorescence spectrometer (Hitachi High-Technologies Corporation). To a 10  $\mu$ M solution of gGlu-2OMe SiR600 in 3 mL of PBS (-), pH 7.4, containing 0.1% DMSO as a cosolvent, GGT (Oriental Yeast Co., Ltd., 50 units) was added at 150 s. The gray line (control) shows the fluorescence change in the absence of GGT (**Figure S18**).

***Ex-vivo* fluorescence imaging of fresh surgical FA, PT and ICP specimens from human breast.** A 50  $\mu$ M solution of HMRef- $\alpha$ Man (3-10 mL) in PBS containing 0.5% *v/v* DMSO as a co-solvent was added to a 3.5 or 5.0 cm dish containing a human surgical specimen so that the tissue was completely soaked with probe solution. The fluorescence images were recorded using an in-house-built portable fluorescence imager. Surgical specimens were evaluated 10 min after resection. The results are summarized in **Figures S11 and S12**.

**Immunohistochemical analysis of PTEN expression.** Formalin-fixed paraffin-embedded tissues were sectioned at 4  $\mu$ m thickness. Immunoperoxidase staining for PTEN (mouse monoclonal antibody, Clone: PTN-18, Lot: 061K4889, Sigma-Aldrich, Inc., Saint Louis, Missouri 63103, U.S.A.) was performed using a Ventana Benchmark XT (Ventana Medical Systems) automated slide staining system. Sections were deparaffinized, pretreated with Cell Conditioning 1 (CC1, Ventana Medicals Systems), reacted with primary antibodies for 32 min at room temperature, visualized with a Ventana DAB detection kits; (iView DAB detection kit) and counter-stained with Hematoxylin and Bluing Reagent. PTEN antibody was diluted to 1/25, and used with the iVIEW DAB detection kit and Endogenous Biotin blocking kit (Ventana Medical Systems). Human breast tissues were used a positive control of PTEN immunostaining. Negative controls were conducted by adding REAL Antibody Diluent (Dako), instead of the primary antibody. The results are summarized in **Figure S23**.

**Immunohistochemical analysis of phospho-AKT (pSer473) expression.** Formalin-fixed paraffin-embedded tissues were sectioned at 4  $\mu$ m thickness. Immunoperoxidase staining for phospho-AKT (pSer473) (rabbit polyclonal antibody, Clone: PSER473, Lot: 129187004, Sigma-Aldrich, Inc., Saint Louis, Missouri 63103, U.S.A.) was performed using a Ventana Benchmark XT (Ventana Medical Systems) automated slide staining system. Sections were deparaffinized, pretreated with protease-1 (Protease1, Ventana Medicals Systems), reacted with primary antibodies for 32 min at room temperature, visualized with a Ventana DAB detection kit (iView DAB detection kit) and counter-stained with Hematoxylin and Bluing Reagent. Phospho-AKT antibody was diluted to 1/50, and used with the iVIEW DAB detection kit and Endogenous Biotin blocking kit (Ventana Medical Systems). Human breast tissues were used as a positive control of phospho-AKT immunostaining. Negative controls were conducted by adding REAL Antibody Diluent (Dako), instead of the primary antibody. The results are summarized in **Figure S23**.

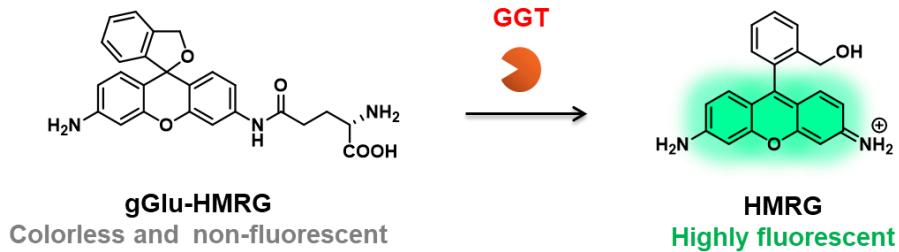

Figure S1.  $\gamma$ -Glutamyltranspeptidase (GGT)-reactive fluorescent probe, gGlu-HMRG.<sup>1</sup>

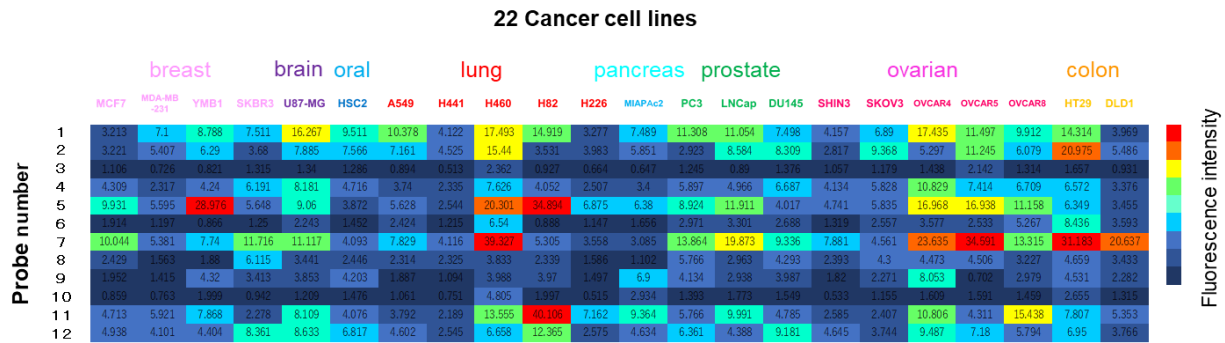

Figure S2. Heat map of intact glycosidase activities in various living cancer cell lines. Fluorescence intensities were quantified by drawing regions of interest (ROIs) on the fluorescence images shown in Figure 2 (a).

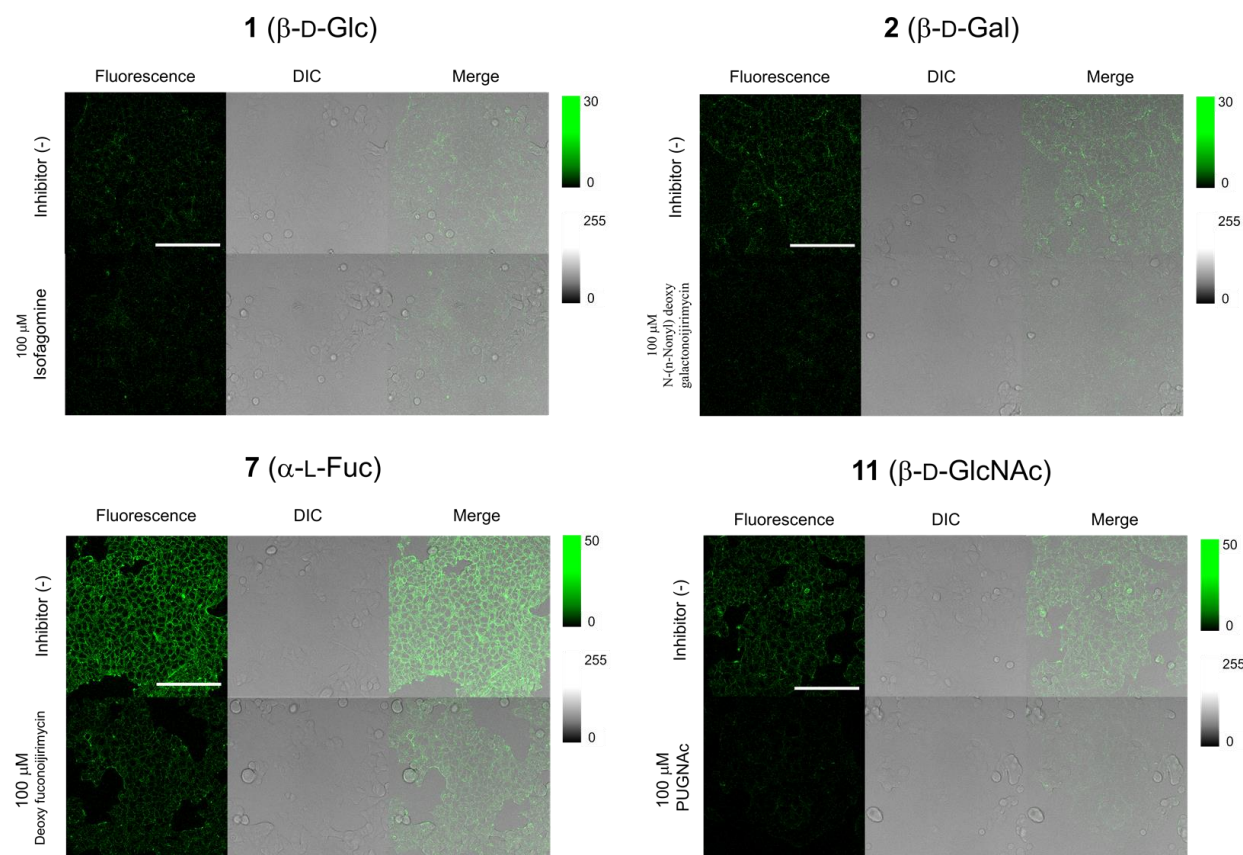

**Figure S3. Confocal images of fluorescence intensity in MCF7 cells treated with each glycosidase-reactive probe in the presence and absence of inhibitor.** Cells were incubated with 5  $\mu$ M fluorescent probe in the presence and absence of each inhibitor for 1 h, and fluorescence images were obtained. Ex/Em = 498 nm/505-600 nm. [fluorescent probe] = 5  $\mu$ M, [inhibitor] = 100  $\mu$ M. Scale bar, 100  $\mu$ m.

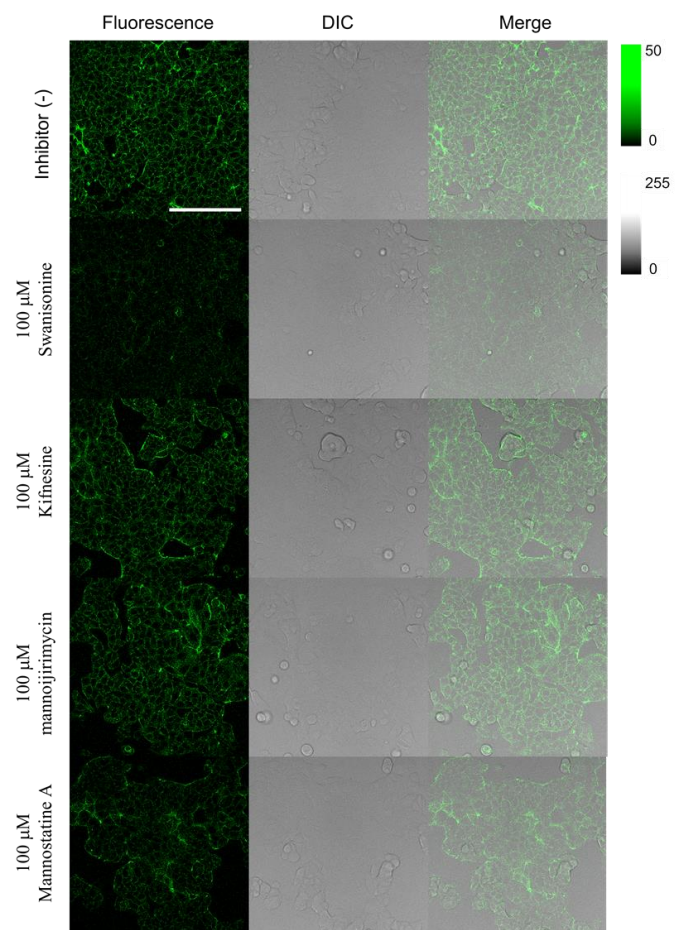

**Figure S4. Confocal images of fluorescence intensity in MCF7 cells treated with HMRef- $\alpha$ Man in the presence and absence of 4 inhibitors of  $\alpha$ -mannosidase.** Cells were incubated with 5  $\mu$ M fluorescent probe in the presence and absence of each inhibitor for 1 h, and fluorescence images were obtained. Swainsonine significantly inhibited the fluorescence increase of HMRef- $\alpha$ Man in MCF7 cells. Ex/Em = 498 nm/505-600 nm. [HMRef- $\alpha$ Man] = 5  $\mu$ M, [inhibitor] = 100  $\mu$ M. Scale bar, 100  $\mu$ m.



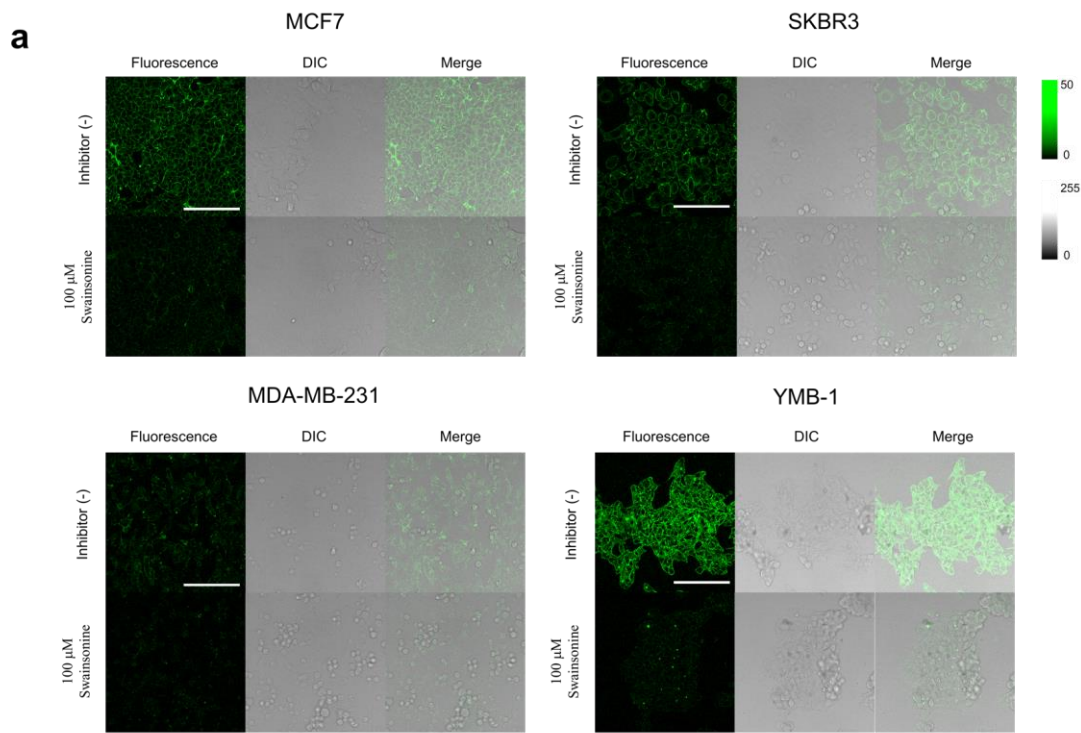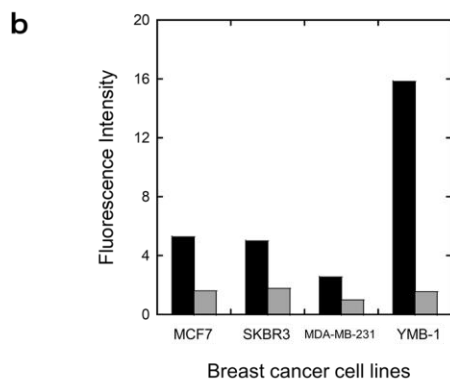

**Figure S5. Inhibition of  $\alpha$ -mannosidase activity by swainsonine in 4 breast cancer cell lines.** (a) Confocal images of fluorescence intensity in MCF7, SKBR3, MDA-MB-231 and YMB-1 breast cancer cells treated with HMRef- $\alpha$ Man in the presence and absence of swainsonine. The fluorescence images of MCF7 are the same images shown in **Figure 2 (d)**. (b) Fluorescence intensity from each breast cancer cell line. Black bars represent fluorescence intensity in the absence of swainsonine. Gray bars represent fluorescence intensity in the presence of swainsonine. Cells were incubated with 5  $\mu$ M fluorescent probe in the presence and absence of swainsonine for 1 h, and fluorescence images were obtained. Ex/Em = 498 nm/505-600 nm. [HMRef- $\alpha$ Man] = 5  $\mu$ M, [swainsonine] = 100  $\mu$ M. Scale bar, 100  $\mu$ m.

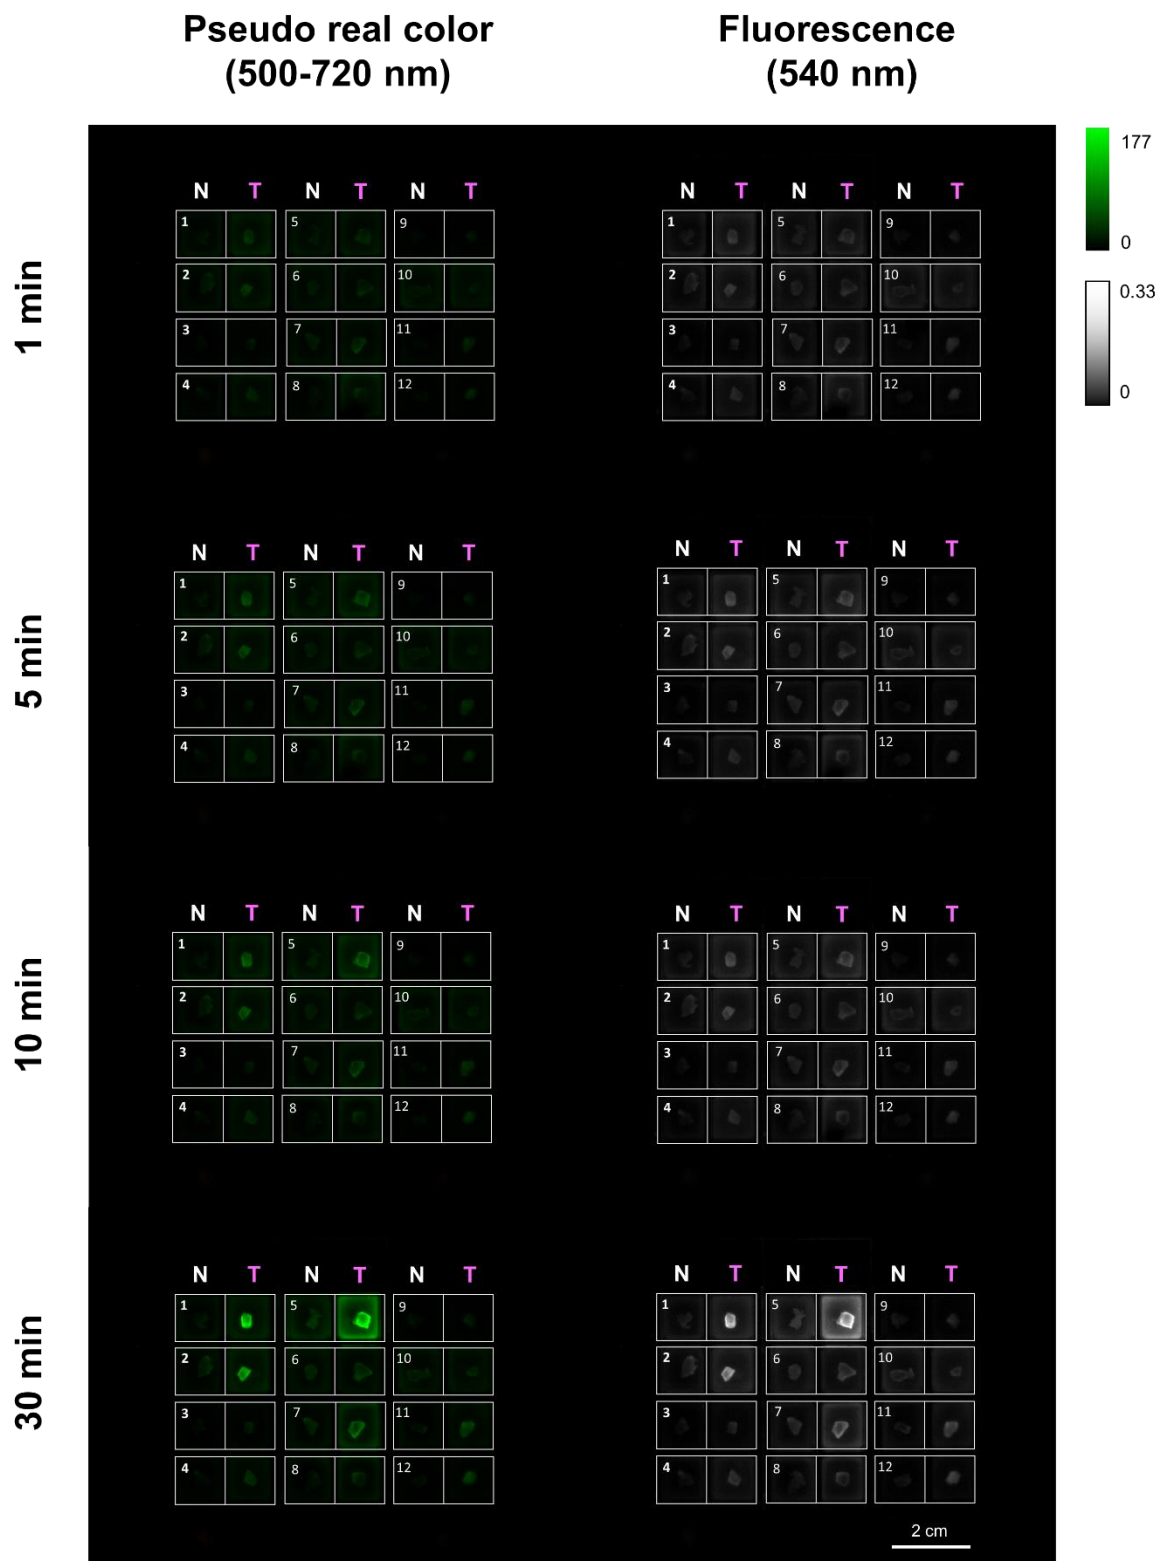

**Figure S6. Example of screening using surgically resected normal and IDC tissues from human breast.**  
 Exposure time = 100 msec, [fluorescent probe] = 50  $\mu$ M. Scale bar, 2 cm.

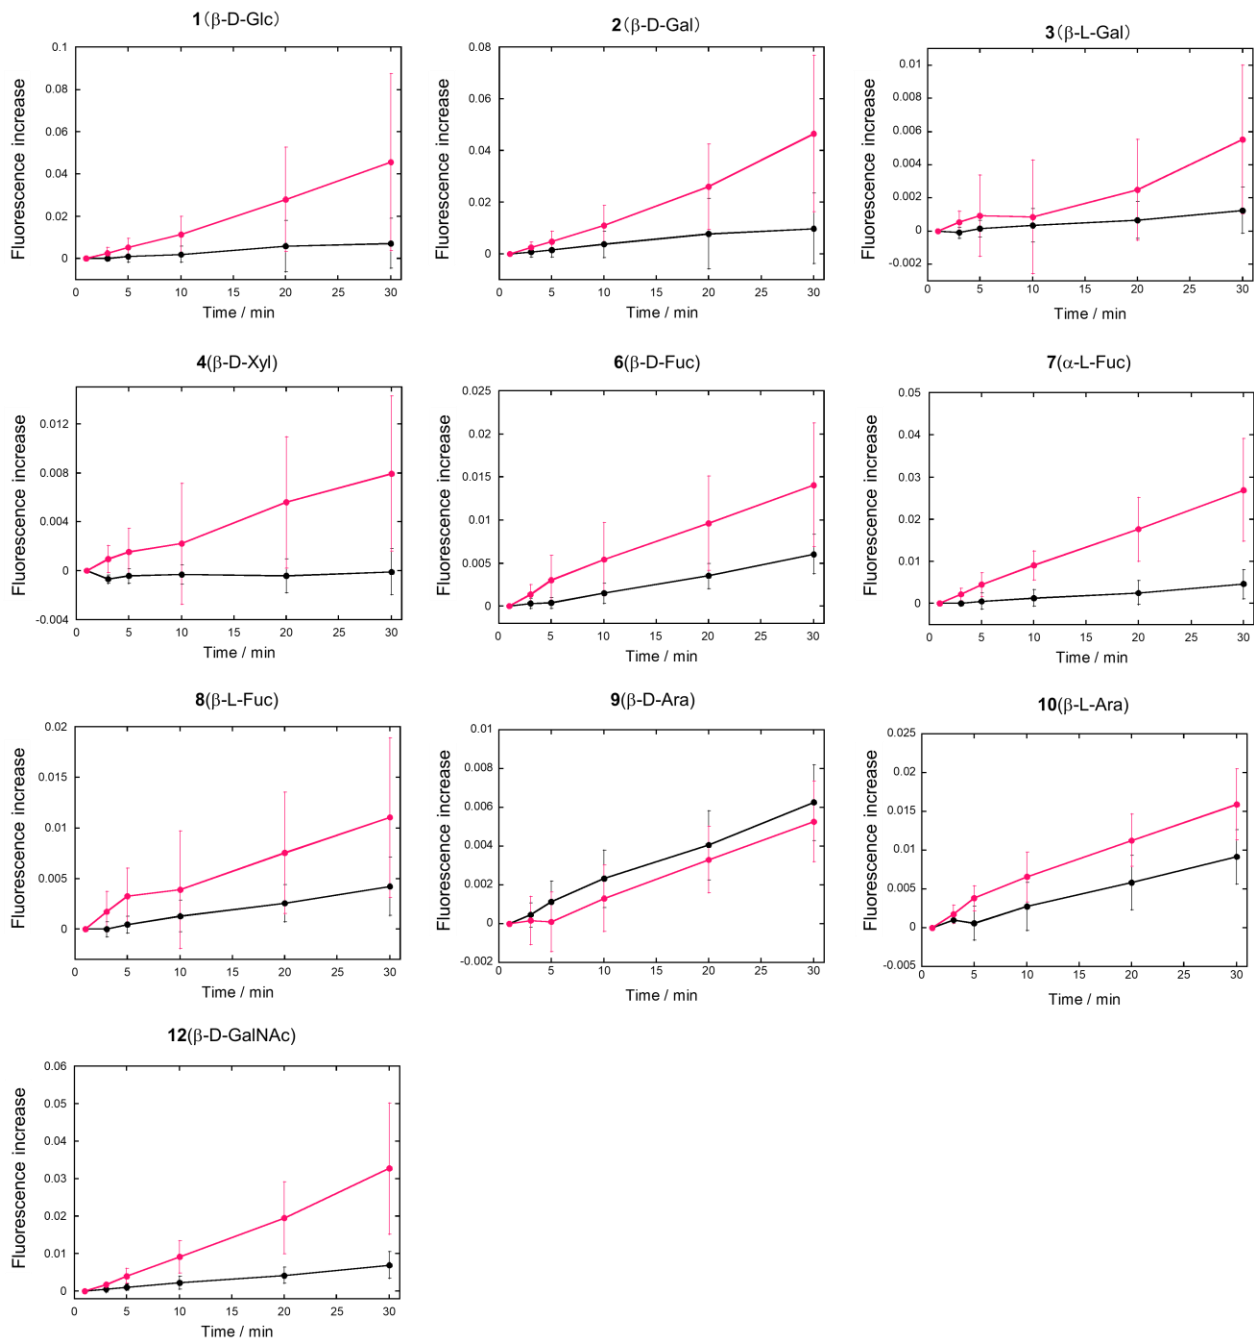

**Figure S7. Time-dependent fluorescence increase of each probe in breast cancer tissues.** Black lines represent fluorescence increases in normal breast tissues. Pink lines represent fluorescence increases in breast cancer (IDC + DCIS) tissues. Normal (N = 14), IDC (N = 5) and DCIS (N = 3) breast tissues were examined. Error bars represent s.d. [fluorescent probe] = 50  $\mu$ M.

**Table S1.** Detection of breast cancer with each fluorescent probe.

| HMRef- $\alpha$ Man (Threshold = 0.117) |   |               |               | Probe <b>11</b> ( $\beta$ -D-GlcNAc) (Threshold = 0.083) |   |               |               |
|-----------------------------------------|---|---------------|---------------|----------------------------------------------------------|---|---------------|---------------|
|                                         |   | diagnosis     |               |                                                          |   | diagnosis     |               |
|                                         |   | F.I. positive | F.I. negative |                                                          |   | F.I. positive | F.I. negative |
| cancer                                  | + | 9             | 1             | cancer                                                   | + | 7             | 1             |
|                                         | - | 0             | 20            |                                                          | - | 2             | 16            |

  

| gGlu-HMRG (Threshold = 0.216) |   |               |               | HMRef- $\alpha$ Man (Threshold = 0.117)<br>gGlu-HMRG (Threshold = 0.216) |   |               |               |
|-------------------------------|---|---------------|---------------|--------------------------------------------------------------------------|---|---------------|---------------|
|                               |   | diagnosis     |               |                                                                          |   | diagnosis     |               |
|                               |   | F.I. positive | F.I. negative |                                                                          |   | F.I. positive | F.I. negative |
| cancer                        | + | 8             | 2             | cancer                                                                   | + | 10            | 0             |
|                               | - | 4             | 15            |                                                                          | - | 4             | 15            |

Breast cancer specimens were diagnosed as F.I. positive (cancer) or F.I. negative (normal) using the indicated threshold values. Calculated PPV, NPV, sensitivity, specificity and AUC are summarized in **Table 1** and **Figure S8**. F.I., Fluorescence increase. AUC, Area under the curve.

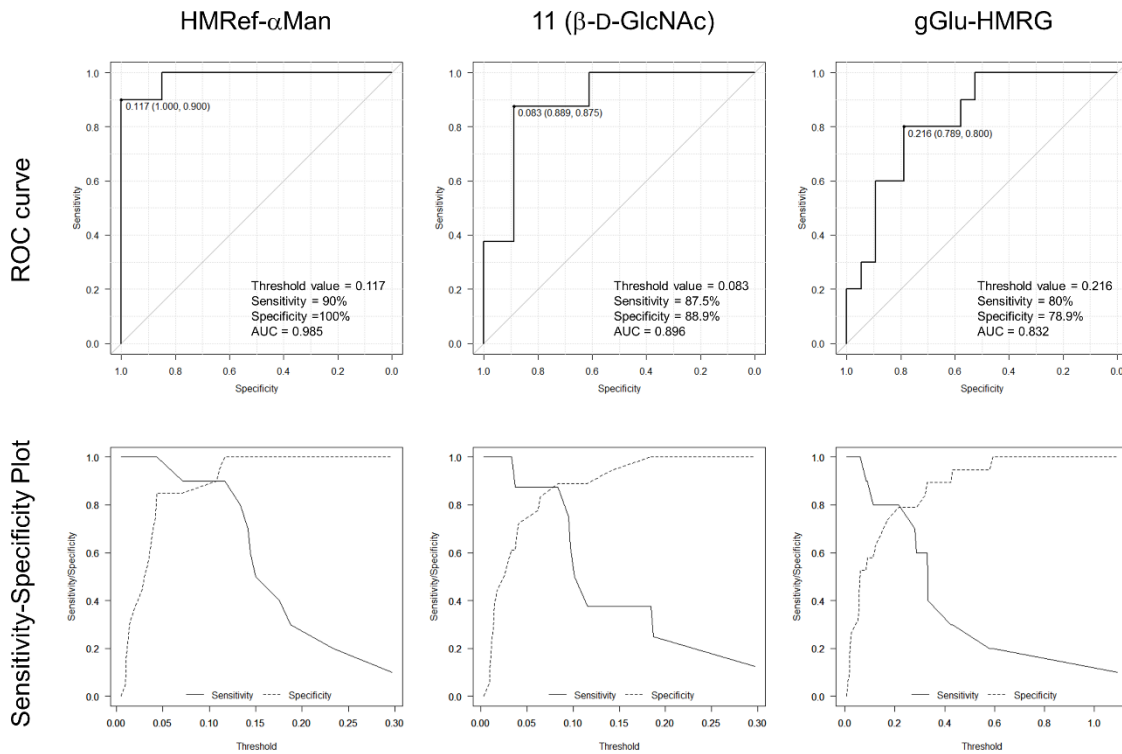

**Figure S8. ROC curves and Sensitivity-Specificity plots for breast cancer detection.** Threshold value, sensitivity, specificity and AUC of each probe were evaluated from the receiver operating characteristic curve. Normal (N = 20), IDC (N = 7) and DCIS (N = 3) tissues were examined with HMRef- $\alpha$ Man. Normal (N = 18), IDC (N = 5) and DCIS (N = 3) tissues were examined with probe **11** ( $\beta$ -D-GlcNAc). Normal (N = 19), IDC (N = 7) and DCIS (N = 3) tissues were examined with gGlu-HMRG.

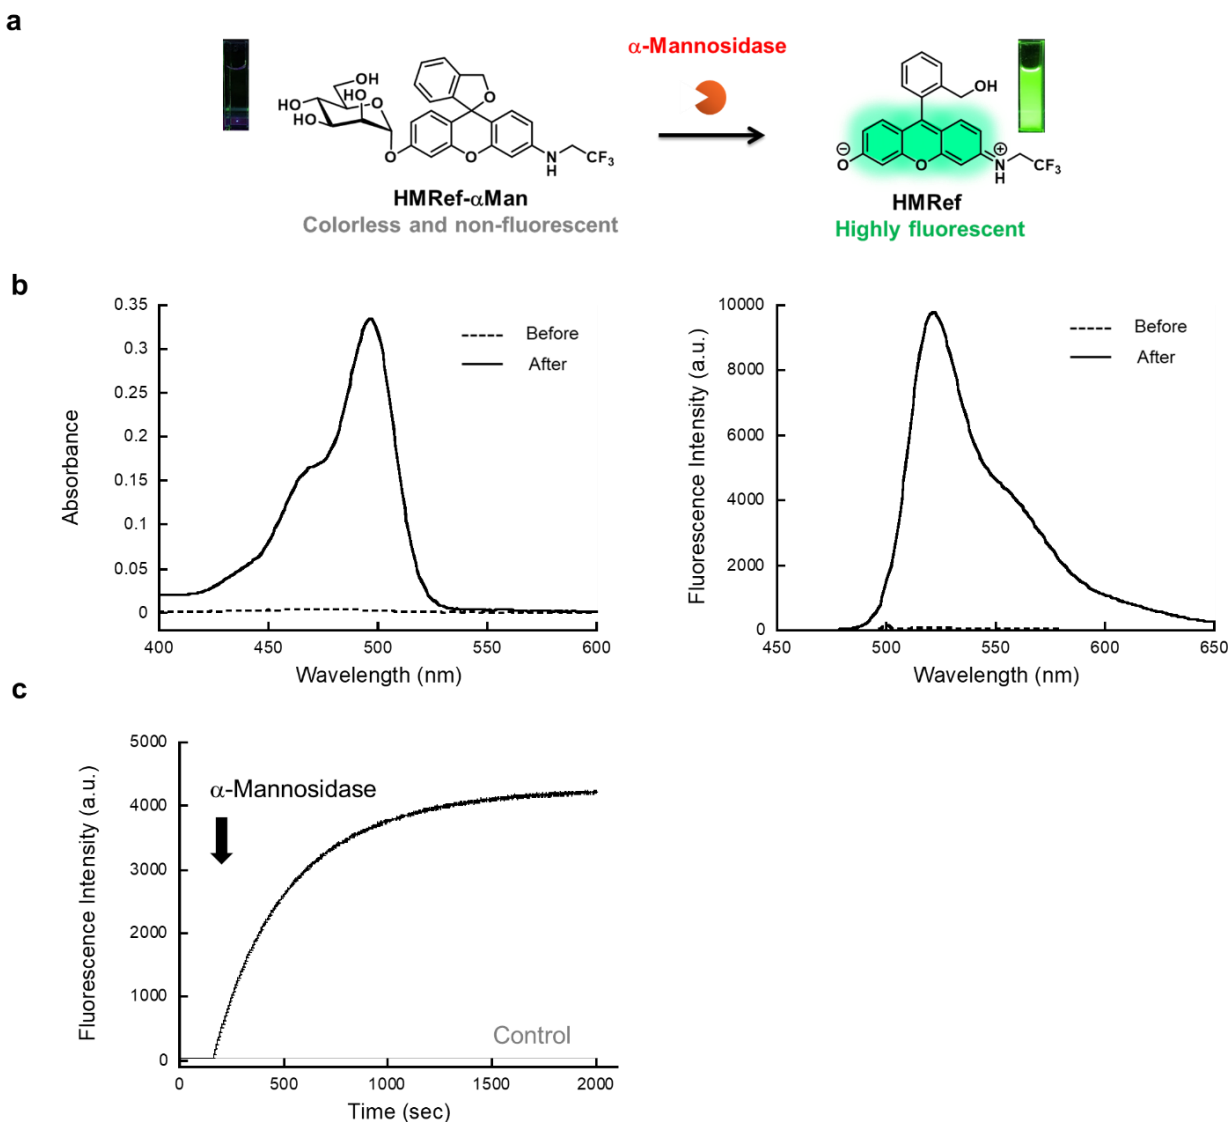

**Figure S9. A novel fluorescent probe for  $\alpha$ -mannosidase activity.** (a) Reaction scheme of HMRef- $\alpha$ Man with  $\alpha$ -mannosidase. (b) Absorption (left) and fluorescence (right) spectra of HMRef- $\alpha$ Man before and after reaction with  $\alpha$ -mannosidase. (c) The time course of fluorescence intensity of HMRef- $\alpha$ Man upon addition of  $\alpha$ -mannosidase from *Canavalia ensiformis* was monitored at excitation/emission wavelengths of 498 nm/540 nm. To a 10  $\mu$ M solution of HMRef- $\alpha$ Man in 3 mL of PBS (-), pH 7.4, containing 0.1% DMSO as a cosolvent,  $\alpha$ -mannosidase (Sigma M7257, 2.4 units) was added at 150 s. The gray line (control) shows the fluorescence change in the absence of  $\alpha$ -mannosidase.

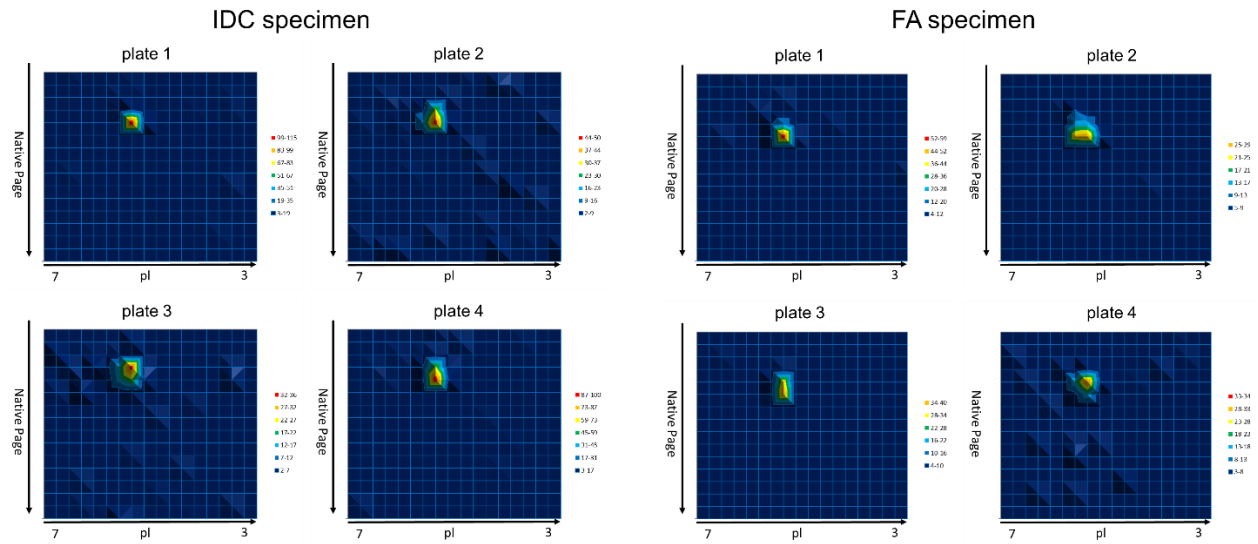

**Figure S10. DEG assay using HMRef- $\alpha$ Man with surgically resected IDC and FA specimens from human breast.** The assays were carried out as reported.<sup>2</sup> A single fluorescent spot was observed on 2D gels and MAN2C1 was identified by peptide mass fingerprinting analysis. Each lysate sample was evaluated on four gels. Gels were incubated with the probe at 37°C for 12 h. Proteins detected by peptide mass fingerprinting analysis are summarized in **Tables S2** and **S3**. [HMRef- $\alpha$ Man] = 1  $\mu$ M.

**Table S2. List of detected proteins in DEG assay of a human IDC surgical specimen. 115 proteins were identified by peptide mass fingerprinting analysis. MAN2C1 is highlighted in yellow.**

|    | Identified Proteins (115)                                                                                            | Molecular Weight | Protein Identification Probability |
|----|----------------------------------------------------------------------------------------------------------------------|------------------|------------------------------------|
| 1  | keratin, type I cytoskeletal 9 [Homo sapiens]                                                                        | 62 kDa           | 100%                               |
| 2  | complement C3 preproprotein [Homo sapiens]                                                                           | 187 kDa          | 100%                               |
| 3  | alpha-2-macroglobulin precursor [Homo sapiens]                                                                       | 163 kDa          | 100%                               |
| 4  | Keratin 10 [Homo sapiens]                                                                                            | 59 kDa           | 100%                               |
| 5  | beta-filamin [Homo sapiens]                                                                                          | 278 kDa          | 100%                               |
| 6  | epidermal cytokeratin 2 [Homo sapiens]                                                                               | 66 kDa           | 100%                               |
| 7  | filamin-A isoform 2 [Homo sapiens]                                                                                   | 281 kDa          | 100%                               |
| 8  | plectin [Homo sapiens]                                                                                               | 532 kDa          | 100%                               |
| 9  | biglycan preproprotein variant, partial [Homo sapiens]                                                               | 42 kDa           | 100%                               |
| 10 | mannosidase, alpha, class 2C, member 1, isoform CRA_a [Homo sapiens]                                                 | 116 kDa          | 100%                               |
| 11 | Keratin 5 [Homo sapiens]                                                                                             | 62 kDa           | 100%                               |
| 12 | LMNA protein [Homo sapiens]                                                                                          | 53 kDa           | 100%                               |
| 13 | talin [Homo sapiens]                                                                                                 | 270 kDa          | 100%                               |
| 14 | extracellular matrix protein periostin-bm [Homo sapiens]                                                             | 87 kDa           | 100%                               |
| 15 | decorin, partial [synthetic construct]                                                                               | 40 kDa           | 100%                               |
| 16 | Chain A, The Crystal Structure Of Murine P97/vcp At 3.6a                                                             | 91 kDa           | 100%                               |
| 17 | collagen type XII alpha-1 [Homo sapiens]                                                                             | 333 kDa          | 100%                               |
| 18 | Keratin 14 [Homo sapiens]                                                                                            | 52 kDa           | 100%                               |
| 19 | keratin 1 [Homo sapiens]                                                                                             | 66 kDa           | 100%                               |
| 20 | Fibronectin 1 [Homo sapiens]                                                                                         | 240 kDa          | 100%                               |
| 21 | Chain A, Structure Of Human Liver Chichi Alcohol Dehydrogenase (A Glutathione- Dependent Formaldehyde Dehydrogenase) | 40 kDa           | 100%                               |
| 22 | Chain A, TapasinERP57 HETERODIMER                                                                                    | 54 kDa           | 100%                               |
| 23 | Chain A, Structure Of Human Glutamate Dehydrogenase-Apo Form                                                         | 56 kDa           | 100%                               |
| 24 | Fatty acid synthase [Homo sapiens]                                                                                   | 273 kDa          | 100%                               |
| 25 | COL6A3 protein [Homo sapiens]                                                                                        | 278 kDa          | 100%                               |
| 26 | Chain A, Human Serum Albumin In A Complex With Myristic Acid And Tri- Iodobenzoic Acid                               | 66 kDa           | 100%                               |
| 27 | Homo sapiens adenyl cyclase-associated protein, partial [synthetic construct]                                        | 52 kDa           | 100%                               |
| 28 | gelsolin isoform b [Homo sapiens]                                                                                    | 81 kDa           | 100%                               |
| 29 | SELENBP1 protein [Homo sapiens]                                                                                      | 45 kDa           | 100%                               |
| 30 | RecName: Full=Glyceraldehyde-3-phosphate dehydrogenase; Short=GAPDH                                                  | 36 kDa           | 100%                               |
| 31 | desmoplakin I [Homo sapiens]                                                                                         | 332 kDa          | 100%                               |
| 32 | hornerin precursor [Homo sapiens]                                                                                    | 282 kDa          | 100%                               |
| 33 | Chain A, Crystal Structure Of Wild-type Human Phosphoglucomutase 1                                                   | 64 kDa           | 100%                               |
| 34 | WDR1 protein [Homo sapiens]                                                                                          | 58 kDa           | 100%                               |
| 35 | spectrin, alpha, non-erythrocytic 1 (alpha-fodrin), isoform CRA_a [Homo sapiens]                                     | 129 kDa          | 100%                               |
| 36 | Mitochondrial alcohol dehydrogenase isozyme III [Komagataella phaffii GS115]                                         | 37 kDa           | 100%                               |
| 37 | Chain A, Solution structure of the CH domain of human transgelin-2                                                   | 17 kDa           | 100%                               |
| 38 | Chain B, Crystal Structure Of S-Nitroso-Nitrosyl Human Hemoglobin A                                                  | 16 kDa           | 100%                               |
| 39 | beta-spectrin [Homo sapiens]                                                                                         | 275 kDa          | 100%                               |
| 40 | Chain A, Crystal structure of human vascular adhesion protein-1                                                      | 85 kDa           | 100%                               |
| 41 | Chain A, Human Complement Factor B                                                                                   | 84 kDa           | 100%                               |
| 42 | Chain A, Human Muscle L-lactate Dehydrogenase M Chain, Ternary Complex With NADH And Oxamate                         | 37 kDa           | 100%                               |
| 43 | PREDICTED: actin, gamma-enteric smooth muscle [Coturnix japonica]                                                    | 42 kDa           | 100%                               |
| 44 | TALDO1 protein, partial [Homo sapiens]                                                                               | 37 kDa           | 100%                               |
| 45 | Chain A, X-Ray Structure Of Human Arginase I: The Mutant D183a In Complex With Abh                                   | 35 kDa           | 100%                               |
| 46 | PREDICTED: junction plakoglobin [Sorex araneus]                                                                      | 80 kDa           | 100%                               |
| 47 | IGHA1, partial [synthetic construct]                                                                                 | 53 kDa           | 100%                               |
| 48 | filaggrin-2 [Homo sapiens]                                                                                           | 248 kDa          | 100%                               |
| 49 | hypothetical protein EGM_12944, partial [Macaca fascicularis]                                                        | 281 kDa          | 100%                               |
| 50 | Chain A, Solution Structure Of Double Super Helix Model                                                              | 28 kDa           | 100%                               |
| 51 | leucine aminopeptidase [Homo sapiens]                                                                                | 56 kDa           | 100%                               |
| 52 | ferritin                                                                                                             | 20 kDa           | 100%                               |
| 53 | Chain A, Crystal Structure Of Wild-Type Human Ferritin H Chain                                                       | 21 kDa           | 100%                               |
| 54 | keratin, type II cytoskeletal 8 [Macaca mulatta]                                                                     | 54 kDa           | 100%                               |
| 55 | Chain A, Crystal Structure Of Bovine Serum Albumin                                                                   | 66 kDa           | 100%                               |
| 56 | hypothetical protein XELAEV_18042575mg [Xenopus laevis]                                                              | 104 kDa          | 100%                               |

|     |                                                                                                                                                                     |         |      |
|-----|---------------------------------------------------------------------------------------------------------------------------------------------------------------------|---------|------|
| 57  | Chain A, Solution structure of the SEA domain of human mucin 1 (MUC1)                                                                                               | 8 kDa   | 100% |
| 58  | Chain A, Atomic Cryoem Structure Of Hsp90-cdc37-cdk4 Complex                                                                                                        | 84 kDa  | 100% |
| 59  | Chain B, Crystal Structure of the Ku Heterodimer                                                                                                                    | 64 kDa  | 100% |
| 60  | Chain A, Crystal Structure Of Sept2 G-Domain                                                                                                                        | 36 kDa  | 100% |
| 61  | desmoglein-1 [Pan paniscus]                                                                                                                                         | 114 kDa | 100% |
| 62  | unnamed protein product [Homo sapiens]                                                                                                                              | 35 kDa  | 100% |
| 63  | Chain E, Leech-Derived Tryptase InhibitorTRYPSIN COMPLEX                                                                                                            | 23 kDa  | 96%  |
| 64  | Complement component 4A (Rodgers blood group) [Homo sapiens]                                                                                                        | 193 kDa | 100% |
| 65  | hCG2001591 [Homo sapiens]                                                                                                                                           | 193 kDa | 100% |
| 66  | 40-kDa keratin protein, partial [Homo sapiens]                                                                                                                      | 44 kDa  | 100% |
| 67  | Chain A, Annexin A2: Does it induce membrane aggregation by a new multimeric state of the protein.                                                                  | 39 kDa  | 100% |
| 68  | Chain B, Crystal structure of alpha5beta1 integrin headpiece (ligand-free form)                                                                                     | 51 kDa  | 100% |
| 69  | Cytokeratin-78 [Macaca mulatta]                                                                                                                                     | 56 kDa  | 100% |
| 70  | Chain C, Solution Structure Of Human Immunoglobulin M                                                                                                               | 57 kDa  | 99%  |
| 71  | LBA isoform beta [Mus musculus]                                                                                                                                     | 310 kDa | 99%  |
| 72  | Chain A, Crystal Structure Of Full-Length Human Peroxiredoxin 4 With T118e Mutation                                                                                 | 28 kDa  | 98%  |
| 73  | AAA ATPase [Walleimia mellicola CBS 633.66]                                                                                                                         | 90 kDa  | 97%  |
| 74  | Chain A, Atpase Domain Of Human Heat Shock 70kda Protein 1                                                                                                          | 42 kDa  | 96%  |
| 75  | Chain A, Crystal Structure Of Recombinant Human Triosephosphate Isomerase At 2.8 Angstroms Resolution. Triosephosphate Isomerase Related Human Genetic Disorders    | 27 kDa  | 100% |
| 76  | Chain A, Crystal structure of phosphorylated mutant of glyceraldehyde 3-phosphate dehydrogenase from human placenta at 3.15A resolution                             | 36 kDa  | 100% |
| 77  | Chain A, The Refined 1.6 Angstroms Resolution Crystal Structure Of The Complex Formed Between Porcine Beta-trypsin And Mcti-a, A Trypsin Inhibitor Of Squash Family | 23 kDa  | 100% |
| 78  | Chain O, Glyceraldehyde-3-phosphate dehydrogenase, liver                                                                                                            | 36 kDa  | 100% |
| 79  | Cyl actin [Tripneustes gratilla]                                                                                                                                    | 42 kDa  | 100% |
| 80  | PREDICTED: adenyl cyclase-associated protein 2 [Pygocentrus nattereri]                                                                                              | 52 kDa  | 100% |
| 81  | elongation factor Tu [Mus musculus]                                                                                                                                 | 50 kDa  | 100% |
| 82  | keratin, type II cytoskeletal 1 [Pongo abelii]                                                                                                                      | 66 kDa  | 100% |
| 83  | Chain A, Crystal Structure Of Human Peroxiredoxin I In Complex With Sulfiredoxin                                                                                    | 22 kDa  | 100% |
| 84  | Chain A, Crystal Structure Of A Single Mutant (n71d) Of Triosephosphate Isomerase From Human                                                                        | 27 kDa  | 100% |
| 85  | Chain B, Model of human IgA2 determined by solution scattering, curve fitting and homology modeling                                                                 | 50 kDa  | 100% |
| 86  | immunoglobulin gamma 2 constant region, partial [Homo sapiens]                                                                                                      | 36 kDa  | 99%  |
| 87  | heat shock protein 70 [Trichinella nativa]                                                                                                                          | 71 kDa  | 98%  |
| 88  | Elongation factor 1-alpha [Hortaea werneckii EXF-2000]                                                                                                              | 50 kDa  | 97%  |
| 89  | PREDICTED: filamin-A isoform X1 [Rattus norvegicus]                                                                                                                 | 281 kDa | 97%  |
| 90  | put. beta-actin (aa 27-375), partial [Mus musculus]                                                                                                                 | 39 kDa  | 97%  |
| 91  | Chain B, Crystal Structure Of The Novel Complex Formed Between Zinc 2- Glycoprotein (Zag) And Prolactin Inducible Protein (Pip) From Human Seminal Plasma           | 14 kDa  | 96%  |
| 92  | BA75_00075T0 [Komagataella pastoris]                                                                                                                                | 47 kDa  | 95%  |
| 93  | Chain A, Mhc Class I Molecule B5301 Complexed With Peptide Tpydinqml From Gag Protein Of Hiv2                                                                       | 32 kDa  | 95%  |
| 94  | transitional endoplasmic reticulum ATPase [Lobosporangium transversale]                                                                                             | 91 kDa  | 95%  |
| 95  | unnamed protein product [Dictyostelium discoideum]                                                                                                                  | 43 kDa  | 94%  |
| 96  | Protein MAM3 [Malassezia restricta CBS 7877]                                                                                                                        | 77 kDa  | 93%  |
| 97  | hypothetical protein BOX15_Mlig026283g2 [Macrostomum lignano]                                                                                                       | 88 kDa  | 93%  |
| 98  | cell division control protein 48 aaa family protein (transitional endoplasmic reticulum atpase),putative [Schistosoma mansoni]                                      | 89 kDa  | 92%  |
| 99  | PREDICTED: filamin-C-like isoform X1 [Pygocentrus nattereri]                                                                                                        | 295 kDa | 91%  |
| 100 | Chain A, Bovine Mitochondrial F1-Atpase                                                                                                                             | 55 kDa  | 90%  |
| 101 | BA75_02285T0 [Komagataella pastoris]                                                                                                                                | 30 kDa  | 89%  |
| 102 | hypothetical protein BN946_scf185000.g91 [Trametes cinnabarina]                                                                                                     | 47 kDa  | 88%  |
| 103 | PIR Superfamily Protein [Plasmodium ovale wallikeri]                                                                                                                | 40 kDa  | 87%  |
| 104 | Chain C, COP9 SIGNALOSOME COMPLEX SUBUNIT 3                                                                                                                         | 48 kDa  | 86%  |
| 105 | Chain A, The Structure Of Pentameric Human Serum Amyloid P Component                                                                                                | 23 kDa  | 83%  |
| 106 | Csa-19 [Homo sapiens]                                                                                                                                               | 25 kDa  | 82%  |
| 107 | PREDICTED: keratin, type II cytoskeletal 75-like [Monodelphis domestica]                                                                                            | 60 kDa  | 82%  |
| 108 | LOW QUALITY PROTEIN: 60S ribosomal protein L10a [Loxodonta africana]                                                                                                | 23 kDa  | 79%  |
| 109 | keratin, type II cytoskeletal 2 epidermal [Meriones unguiculatus]                                                                                                   | 67 kDa  | 70%  |
| 110 | keratin, type I cytoskeletal 13 [Phyllostomus discolor]                                                                                                             | 49 kDa  | 45%  |



|     |                                                                      |         |     |
|-----|----------------------------------------------------------------------|---------|-----|
| 111 | beta-actin 2 [Sinonovacula constricta]                               | 42 kDa  | 36% |
| 112 | PREDICTED: filamin-B isoform X1 [Jaculus jaculus]                    | 279 kDa | 34% |
| 113 | immunoglobulin variable region, partial [Homo sapiens]               | 15 kDa  | 15% |
| 114 | PREDICTED: keratin, type II cytoskeletal 72 [Galeopterus variegatus] | 48 kDa  | 14% |
| 115 | hypothetical protein CAPTEDRAFT_205416 [Capitella teleta]            | 55 kDa  | 5%  |

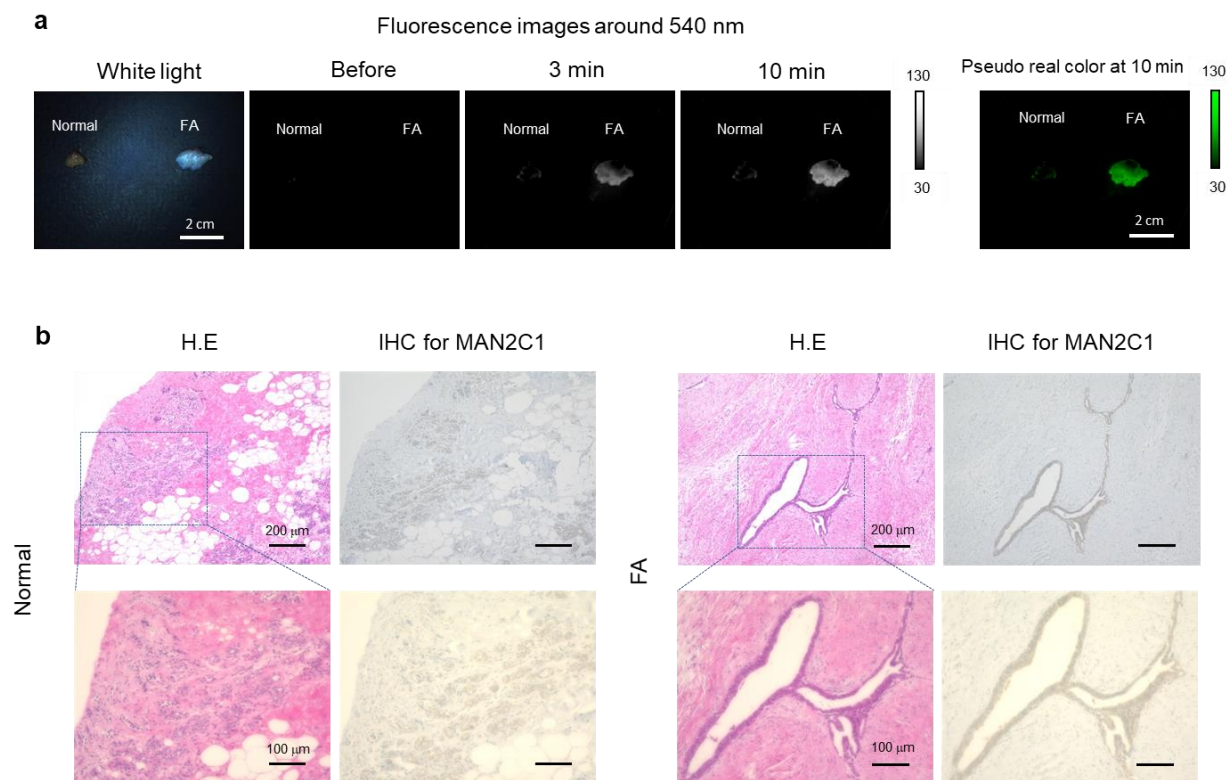

**Figure S11. Evaluation of probe HMRef- $\alpha$ Man in surgically resected fresh normal and FA tissues from human breast. (a)** Time-dependent fluorescence images. The probe showed a significant fluorescence increase only in FA tissue. Surgical specimens were evaluated within 10 min after resection. Probe solution was prepared with PBS (-) containing 0.5 v/v % DMSO as a co-solvent. [HMRef- $\alpha$ Man] = 50  $\mu$ M. Scale bar, 2 cm. **(b)** Histological analysis and IHC analysis for MAN2C1 of in the same specimen. Scale bar, 200  $\mu$ m (upper), or 100  $\mu$ m (lower).

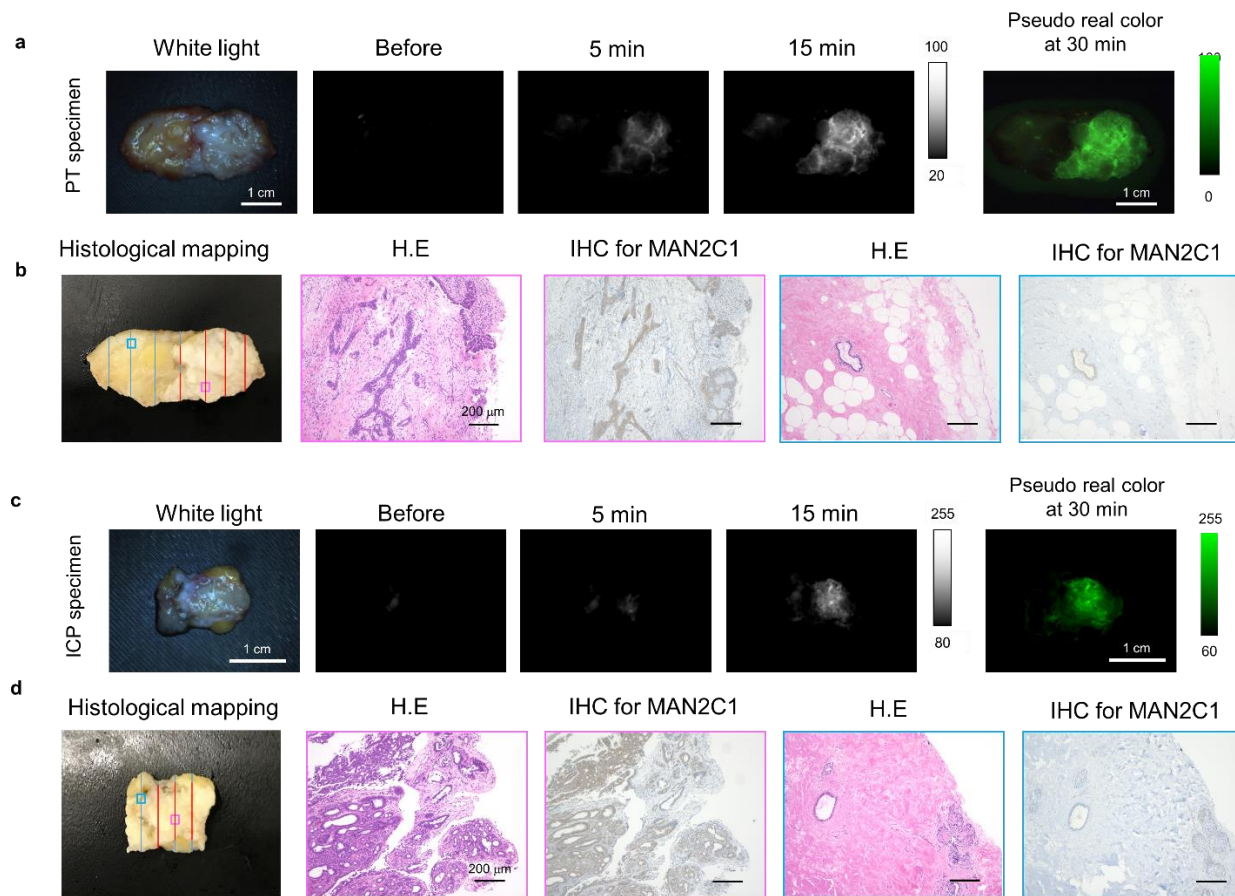

**Figure S12. Evaluation of probe HMRef- $\alpha$ Man in surgically resected fresh PT and ICP tissues from human breast.** (a) Time-dependent fluorescence image of surgically resected fresh human PT specimens containing both normal and benign tissues after administration of HMRef- $\alpha$ Man. Probe solution was prepared with PBS (-) containing 0.5 v/v % DMSO as a co-solvent. [HMRef- $\alpha$ Man] = 50  $\mu$ M. Scale bar, 1 cm. (b) Histological mapping of the specimen: red lines show PT and blue lines show no tumor (left). Histological analysis and IHC analysis for MAN2C1 of boxed regions with strong fluorescence activation (pink box) or with no fluorescence activation (blue box). Scale bar, 200  $\mu$ m. (c) Time-dependent fluorescence image of surgically resected fresh human ICP specimens containing both normal and benign tissues after administration of HMRef- $\alpha$ Man. Probe solution was prepared with PBS (-) containing 0.5 v/v % DMSO as a co-solvent. [HMRef- $\alpha$ Man] = 50  $\mu$ M. Scale bar, 1 cm. (d) Histological mapping of the specimen: red lines show ICP and blue lines show no tumor (left). Histological analysis and IHC analysis for MAN2C1 of boxed regions with strong fluorescence activation (pink box) or with no fluorescence activation (blue box). The IHC image of IDP are the same image shown in **Figure 5 (a)**. Scale bar, 200  $\mu$ m.

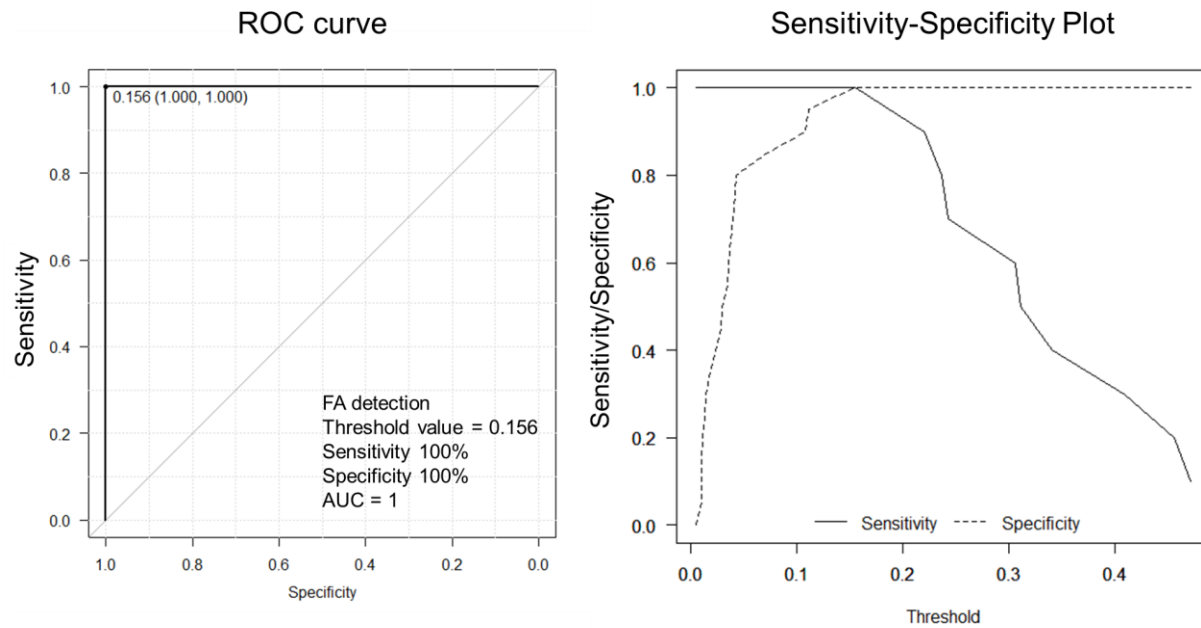

**Figure S13. ROC curves and Sensitivity-Specificity plots for FA detection.** Threshold value, sensitivity, specificity and AUC of HMRef- $\alpha$ Man in FA detection were evaluated from the receiver operating characteristic curve (N = 20 for normal, N = 10 for FA).

**Table S3. List of detected proteins in DEG assay of a human FA surgical specimen.** 104 proteins were identified by peptide mass fingerprinting analysis. MAN2C1 (also known as  $\alpha$ -mannosidase 6A8B) is highlighted in yellow.

|    | Identified Proteins (104)                                                                                                                                                                                    | Molecular Weight | Protein Identification Probability |
|----|--------------------------------------------------------------------------------------------------------------------------------------------------------------------------------------------------------------|------------------|------------------------------------|
| 1  | beta-filamin [Homo sapiens]                                                                                                                                                                                  | 278 kDa          | 100%                               |
| 2  | fibronectin 1, isoform CRA_h [Homo sapiens]                                                                                                                                                                  | 256 kDa          | 100%                               |
| 3  | fatty acid synthase [Homo sapiens]                                                                                                                                                                           | 273 kDa          | 100%                               |
| 4  | talin-1 [Homo sapiens]                                                                                                                                                                                       | 271 kDa          | 100%                               |
| 5  | tenascin X [Homo sapiens]                                                                                                                                                                                    | 464 kDa          | 100%                               |
| 6  | filamin-A isoform 2 [Homo sapiens]                                                                                                                                                                           | 281 kDa          | 100%                               |
| 7  | beta-spectrin [Homo sapiens]                                                                                                                                                                                 | 275 kDa          | 100%                               |
| 8  | keratin, type I cytoskeletal 9 [Homo sapiens]                                                                                                                                                                | 62 kDa           | 100%                               |
| 9  | Keratin 10 [Homo sapiens]                                                                                                                                                                                    | 59 kDa           | 100%                               |
| 10 | spectrin, alpha, non-erythrocytic 1 (alpha-fodrin) variant, partial [Homo sapiens]                                                                                                                           | 288 kDa          | 100%                               |
| 11 | Keratin 8 [Homo sapiens]                                                                                                                                                                                     | 54 kDa           | 100%                               |
| 12 | alpha-2-macroglobulin precursor [Homo sapiens]                                                                                                                                                               | 163 kDa          | 100%                               |
| 13 | adenylyl cyclase-associated protein 1 isoform a [Homo sapiens]                                                                                                                                               | 52 kDa           | 100%                               |
| 14 | Chain A, Structure Of Human Apolactoferrin At 2.0 A Resolution.                                                                                                                                              | 76 kDa           | 100%                               |
| 15 | Chain B, Quantitative Interaction Mapping Reveals An Extended Ubiquitin Regulatory Domain In Aspl That Disrupts Functional P97 Hexamers And Induces Cell Death                                               | 89 kDa           | 100%                               |
| 16 | 40-kDa keratin protein, partial [Homo sapiens]                                                                                                                                                               | 44 kDa           | 100%                               |
| 17 | ATP:citrate lyase [Homo sapiens]                                                                                                                                                                             | 121 kDa          | 100%                               |
| 18 | epidermal cytokeratin 2 [Homo sapiens]                                                                                                                                                                       | 66 kDa           | 100%                               |
| 19 | Homo sapiens lamin A/C, partial [synthetic construct]                                                                                                                                                        | 65 kDa           | 100%                               |
| 20 | Chain A, Crystal Structure Of Recombinant Human Triosephosphate Isomerase At 2.8 Angstroms Resolution. Triosephosphate Isomerase Related Human Genetic Disorders And Comparison With The Trypanosomal Enzyme | 27 kDa           | 100%                               |
| 21 | Keratin 18 [Homo sapiens]                                                                                                                                                                                    | 48 kDa           | 100%                               |
| 22 | plectin 1, intermediate filament binding protein 500kDa, isoform CRA_c [Homo sapiens]                                                                                                                        | 290 kDa          | 100%                               |
| 23 | Keratin 7 [Homo sapiens]                                                                                                                                                                                     | 51 kDa           | 100%                               |
| 24 | Homo sapiens actinin, alpha 1, partial [synthetic construct]                                                                                                                                                 | 103 kDa          | 100%                               |
| 25 | TGFBI, partial [synthetic construct]                                                                                                                                                                         | 75 kDa           | 100%                               |
| 26 | Chain A, Crystal structure of smooth muscle G actin DNase I complex                                                                                                                                          | 42 kDa           | 100%                               |
| 27 | Chain A, Complex of APLF factor and Ku heterodimer bound to DNA                                                                                                                                              | 63 kDa           | 100%                               |
| 28 | hypothetical protein EGM_12944, partial [Macaca fascicularis]                                                                                                                                                | 281 kDa          | 100%                               |
| 29 | PREDICTED: keratin, type I cytoskeletal 16 isoform X1 [Mandrillus leucophaeus]                                                                                                                               | 92 kDa           | 100%                               |
| 30 | Chain B, Crystal Structure of the Ku Heterodimer                                                                                                                                                             | 64 kDa           | 100%                               |
| 31 | Chain A, Crystal structure of phosphorylated mutant of glyceraldehyde 3-phosphate dehydrogenase from human placenta at 3.15A resolution                                                                      | 36 kDa           | 100%                               |
| 32 | complement component C3 [Homo sapiens]                                                                                                                                                                       | 187 kDa          | 100%                               |
| 33 | Keratin 6A [Homo sapiens]                                                                                                                                                                                    | 60 kDa           | 100%                               |
| 34 | keratin 1 [Homo sapiens]                                                                                                                                                                                     | 66 kDa           | 100%                               |
| 35 | Membrane-organizing extension spike protein, partial [Macaca mulatta]                                                                                                                                        | 67 kDa           | 100%                               |
| 36 | IGHA1, partial [synthetic construct]                                                                                                                                                                         | 53 kDa           | 100%                               |
| 37 | decorin, partial [synthetic construct]                                                                                                                                                                       | 40 kDa           | 100%                               |
| 38 | elongation factor Tu [Mus musculus]                                                                                                                                                                          | 50 kDa           | 100%                               |
| 39 | Chain 4, Structure Of The 80s Mammalian Ribosome Bound To Ee f2 (this Entry Contains The Large Ribosomal Subunit Proteins)                                                                                   | 95 kDa           | 100%                               |
| 40 | heat shock protein 70 [Megalobrama amblycephala]                                                                                                                                                             | 71 kDa           | 100%                               |
| 41 | PREDICTED: phosphatidylinositol transfer protein beta isoform-like isoform X1 [Colobus angolensis palliatus]                                                                                                 | 32 kDa           | 100%                               |
| 42 | alpha actinin 4 [Homo sapiens]                                                                                                                                                                               | 102 kDa          | 100%                               |
| 43 | PREDICTED: dynactin subunit 1 isoform X6 [Gorilla gorilla gorilla]                                                                                                                                           | 139 kDa          | 100%                               |
| 44 | Chain A, Structure Of Human Placental S-adenosylhomocysteine Hydrolase: Determination Of A 30 Sulfur Atom Substructure From Data At A Single Wavelength                                                      | 47 kDa           | 100%                               |
| 45 | vimentin [Homo sapiens]                                                                                                                                                                                      | 54 kDa           | 100%                               |
| 46 | unnamed protein product [Homo sapiens]                                                                                                                                                                       | 53 kDa           | 100%                               |
| 47 | Rho-associated, coiled-coil containing protein kinase 1 [Homo sapiens]                                                                                                                                       | 158 kDa          | 100%                               |
| 48 | Chain A, Structure Of Human Glutamate Dehydrogenase-Apo Form                                                                                                                                                 | 56 kDa           | 100%                               |

|     |                                                                                                                                |         |      |
|-----|--------------------------------------------------------------------------------------------------------------------------------|---------|------|
| 49  | keratin 5 [Homo sapiens]                                                                                                       | 62 kDa  | 100% |
| 50  | Chain A, Human Muscle L-lactate Dehydrogenase M Chain, Ternary Complex With Nadh And Oxamate                                   | 37 kDa  | 100% |
| 51  | Chain A, Crystal Structure Of Human Serum Albumin                                                                              | 66 kDa  | 100% |
| 52  | Ig alpha-2 chain - human (fragment)                                                                                            | 37 kDa  | 100% |
| 53  | beta-actin [Neovison vison]                                                                                                    | 42 kDa  | 100% |
| 54  | PREDICTED: LOW QUALITY PROTEIN: pre-mRNA-processing factor 19, partial [Acanthisitta chloris]                                  | 53 kDa  | 100% |
| 55  | Chain A, Crystal Structure Of Udp-Glucose Pyrophosphorylase Of Homo Sapiens                                                    | 59 kDa  | 100% |
| 56  | alpha mannosidase 6A8B [Homo sapiens]                                                                                          | 118 kDa | 100% |
| 57  | tenascin C (hexabrachion), isoform CRA_a [Homo sapiens]                                                                        | 241 kDa | 100% |
| 58  | filamin, alpha (predicted), isoform CRA_b [Rattus norvegicus]                                                                  | 277 kDa | 100% |
| 59  | Chain L, CRYSTAL STRUCTURE OF A CHIMERIC FAB' FRAGMENT OF AN ANTIBODY BINDING TUMOUR CELLS                                     | 23 kDa  | 100% |
| 60  | Chain C, Solution Structure Of Human Immunoglobulin M                                                                          | 57 kDa  | 100% |
| 61  | beta-actin, partial [Falco peregrinus]                                                                                         | 15 kDa  | 100% |
| 62  | Chain A, Crystal structure of human Gelsolin domains G1-G3 bound to Actin                                                      | 42 kDa  | 100% |
| 63  | Chain A, Structure Of Human Liver Chichi Alcohol Dehydrogenase (A Glutathione-Dependent Formaldehyde Dehydrogenase)            | 40 kDa  | 100% |
| 64  | extracellular matrix protein periostin-bm [Homo sapiens]                                                                       | 87 kDa  | 100% |
| 65  | tenascin isoform X5 [Homo sapiens]                                                                                             | 231 kDa | 100% |
| 66  | keratin 15, partial [synthetic construct]                                                                                      | 49 kDa  | 100% |
| 67  | Chain E, Leech-Derived Trypsin InhibitorTRYPSIN COMPLEX                                                                        | 23 kDa  | 100% |
| 68  | filaggrin-2 [Homo sapiens]                                                                                                     | 248 kDa | 100% |
| 69  | Chain A, Solution Structure Of Double Super Helix Model                                                                        | 28 kDa  | 100% |
| 70  | Chain A, Artificial Mutant (Alpha Y42h) Of Deoxy Hemoglobin                                                                    | 15 kDa  | 100% |
| 71  | AAA ATPase [Walleimia mellicola CBS 633.66]                                                                                    | 90 kDa  | 100% |
| 72  | hypothetical protein EGK_03743 [Macaca mulatta]                                                                                | 11 kDa  | 99%  |
| 73  | actin, partial [Ghelna canadensis]                                                                                             | 26 kDa  | 97%  |
| 74  | PREDICTED: cationic trypsin-3 [Marmota marmota marmota]                                                                        | 26 kDa  | 97%  |
| 75  | Threonyl-tRNA synthetase, cytoplasmic, partial [Anas platyrhynchos]                                                            | 82 kDa  | 94%  |
| 76  | keratin, type II cytoskeletal 1 [Pongo abelii]                                                                                 | 66 kDa  | 100% |
| 77  | PREDICTED: keratin, type I cytoskeletal 15 [Propithecus coquereli]                                                             | 49 kDa  | 99%  |
| 78  | PREDICTED: anionic trypsin-1 [Jaculus jaculus]                                                                                 | 26 kDa  | 98%  |
| 79  | beta actin, partial [Dasyatis akajei]                                                                                          | 35 kDa  | 97%  |
| 80  | PREDICTED: actin-5C-like [Rhagoletis zephyria]                                                                                 | 42 kDa  | 96%  |
| 81  | hypothetical protein BOX15_Mlig026283g2 [Macrostromum lignano]                                                                 | 88 kDa  | 96%  |
| 82  | cell division control protein 48 aaa family protein (transitional endoplasmic reticulum atpase),putative [Schistosoma mansoni] | 89 kDa  | 94%  |
| 83  | actin, partial [Habronattus americanus]                                                                                        | 28 kDa  | 92%  |
| 84  | Chain A, Crystal Structure Of Sept2 G-Domain                                                                                   | 36 kDa  | 90%  |
| 85  | Peripherin [Myotis brandtii]                                                                                                   | 66 kDa  | 90%  |
| 86  | ribosomal protein L10 [Homo sapiens]                                                                                           | 24 kDa  | 80%  |
| 87  | polyposis locus-encoded protein [Homo sapiens]                                                                                 | 21 kDa  | 78%  |
| 88  | PREDICTED: supervillin [Nanorana parkeri]                                                                                      | 260 kDa | 78%  |
| 89  | Chain A, Crystal Structure Of The Mouse Cavin1 Hr1 Domain                                                                      | 12 kDa  | 78%  |
| 90  | beta-actin, partial [Oryzias dancena]                                                                                          | 32 kDa  | 76%  |
| 91  | HLH domain-containing protein [Oryctes borbonicus]                                                                             | 264 kDa | 76%  |
| 92  | pectin isoform X1 [Carlito syrichta]                                                                                           | 534 kDa | 75%  |
| 93  | keratin, type II cytoskeletal 75 [Mus pahari]                                                                                  | 118 kDa | 73%  |
| 94  | Chain E, Complex Of Eeti-Ii With Porcine Trypsin                                                                               | 24 kDa  | 71%  |
| 95  | beta-actin, partial [Gobio gobio]                                                                                              | 17 kDa  | 69%  |
| 96  | hypothetical protein AB205_0198390, partial [Rana catesbeiana]                                                                 | 47 kDa  | 64%  |
| 97  | periodontal ligament-specific periostin [Homo sapiens]                                                                         | 84 kDa  | 62%  |
| 98  | Chain A, Solution structure of the SEA domain of human mucin 1 (MUC1)                                                          | 8 kDa   | 32%  |
| 99  | Zgc:73317 [Danio rerio]                                                                                                        | 51 kDa  | 28%  |
| 100 | PREDICTED: threonine--tRNA ligase, cytoplasmic [Clupea harengus]                                                               | 83 kDa  | 13%  |
| 101 | PREDICTED: keratin, type I cytoskeletal 19-like, partial [Hipposideros armiger]                                                | 30 kDa  | 4%   |
| 102 | actin, partial [Talavera minuta]                                                                                               | 22 kDa  | 4%   |
| 103 | hypothetical protein cypCar_00032676, partial [Cyprinus carpio]                                                                | 91 kDa  | 0%   |
| 104 | hypothetical protein A6R68_16192 [Neotoma lepida]                                                                              | 48 kDa  | 0%   |

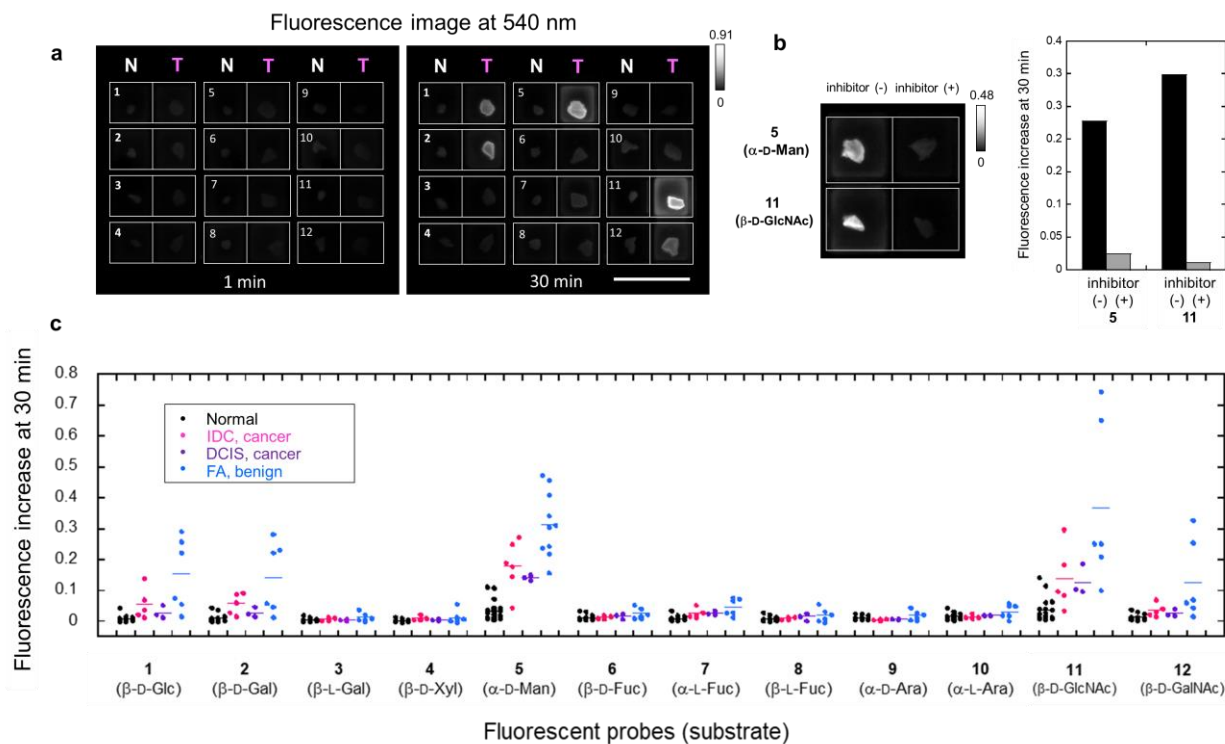

**Figure S14. Comparison of fluorescence increase in normal, cancer and FA (benign) breast specimens.** (a) Example of screening using surgically resected frozen human breast FA and normal tissues. The compound number of the applied probe is shown on each well. Probe solution was prepared with PBS (-) containing 0.5 v/v % DMSO as a co-solvent. [fluorescent probe] = 50  $\mu$ M. (b) Fluorescence increase at 30 min in breast FA tissues in the presence and absence of each inhibitor. Black bars: fluorescence increase in the absence of inhibitor. Gray bars: the fluorescence increase in the presence of inhibitor. [fluorescent probe] = 50  $\mu$ M, [swainsonine] = 500  $\mu$ M for probe **5** (HMRef- $\alpha$ Man), [PUGNAc] = 500  $\mu$ M for probe **11** ( $\beta$ -D-GlcNAc). (c) Comprehensive analysis of intact glycosidase activities in normal breast, IDC, DCIS and FA tissues using 12 fluorescent probes. Fluorescence increase represents the increase at 30 min from 1 min after addition of fluorescent probes. Black, pink, purple and blue dots represent fluorescence increase in normal, IDC, DCIS and FA tissues, respectively. For probe **5** (HMRef- $\alpha$ Man), normal (N = 20), IDC (N = 7), DCIS (N = 3) and FA (N = 10) tissues were examined. For other probes, normal (N = 14), IDC (N = 5), DCIS (N = 3) and FA (N = 6) tissues were examined. Plots of normal, IDC and DCIS contain the same values as shown in **Figure 3** (d). [fluorescent probe] = 50  $\mu$ M.

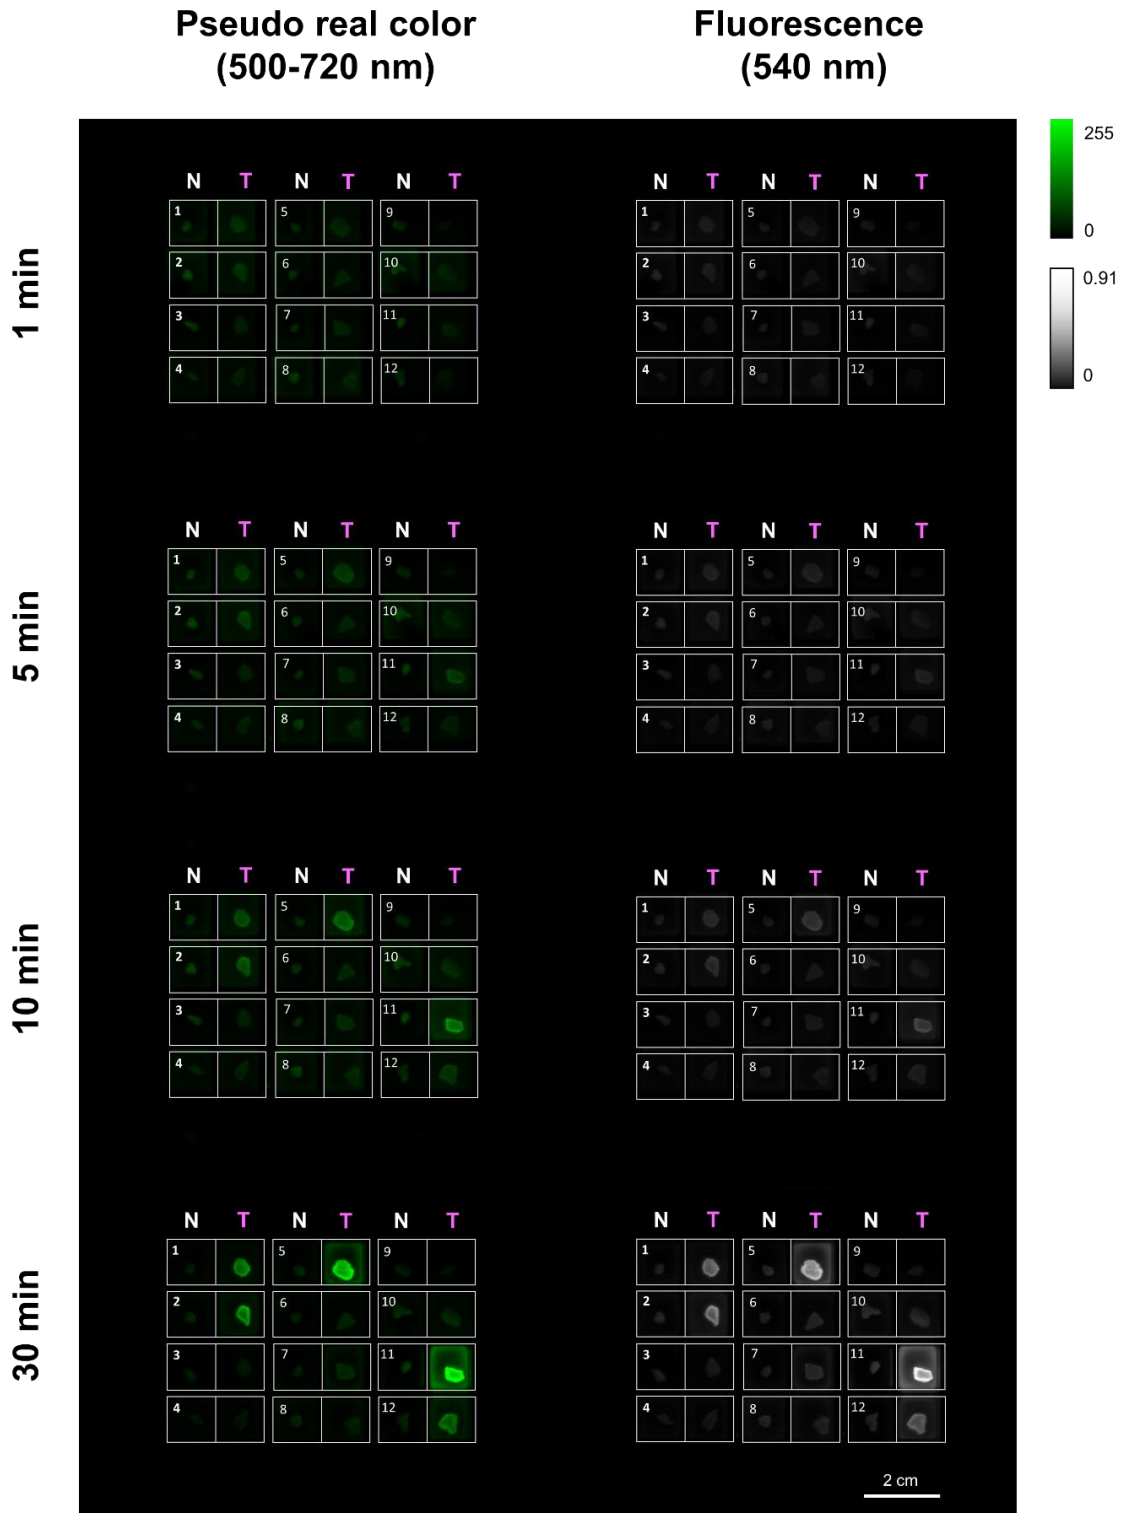

Figure S15. Example of screening with surgically resected normal and FA tissues from human breast. Exposure time = 100 msec (1-10 min), 60 msec (30 min), [fluorescent probe] = 50  $\mu$ M. Scale bar, 2 cm.



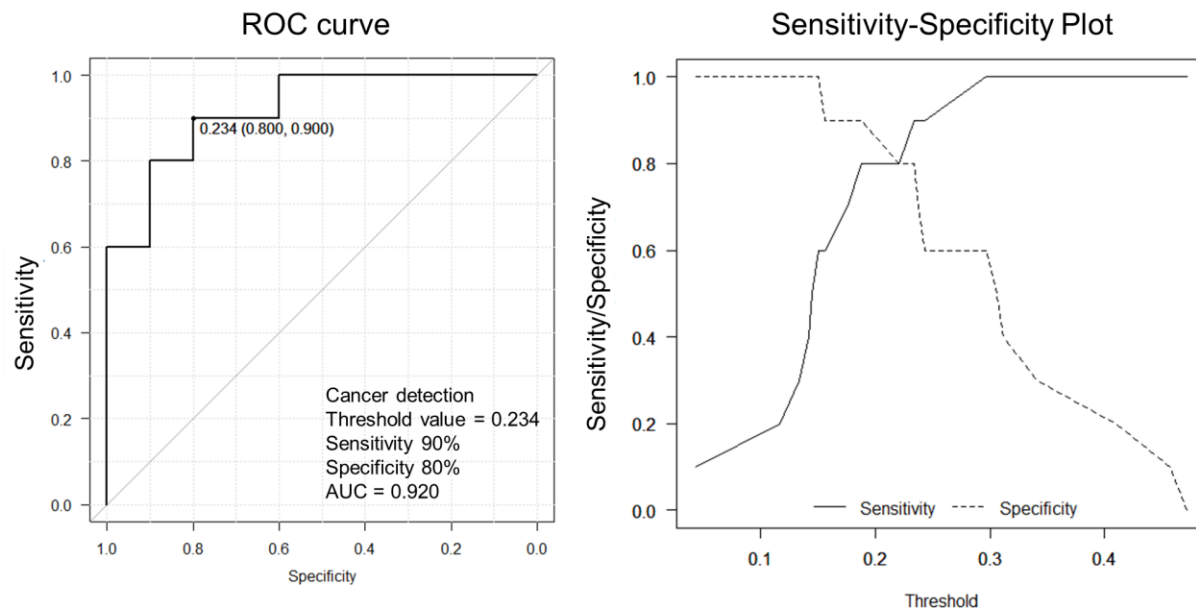

**Figure S16. ROC curve and sensitivity-specificity plot for binary classification (cancer/FA) by HMRef- $\alpha$ Man.** Threshold value, sensitivity, specificity and AUC of each probe were evaluated from the receiver operating characteristic curve. Breast cancer (N = 7 for IDC, N = 3 for DCIS) and FA (N = 10) tissues were examined.

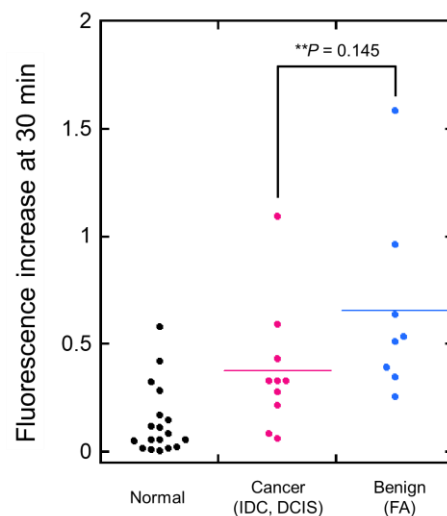

**Figure S17. Fluorescence increases of gGlu-HMRG in normal, cancer (IDC and DCIS) and benign (FA) tissues from human breast.** Plots of normal, IDC and DCIS contain the same values as shown in **Figure 3 (d)**.  $P = 0.145$  by Welch's  $t$ -test (N = 19 for normal, N = 7 for IDC, N = 3 for DCIS, N = 8 for FA). [gGlu-HMRG] = 50  $\mu$ M.

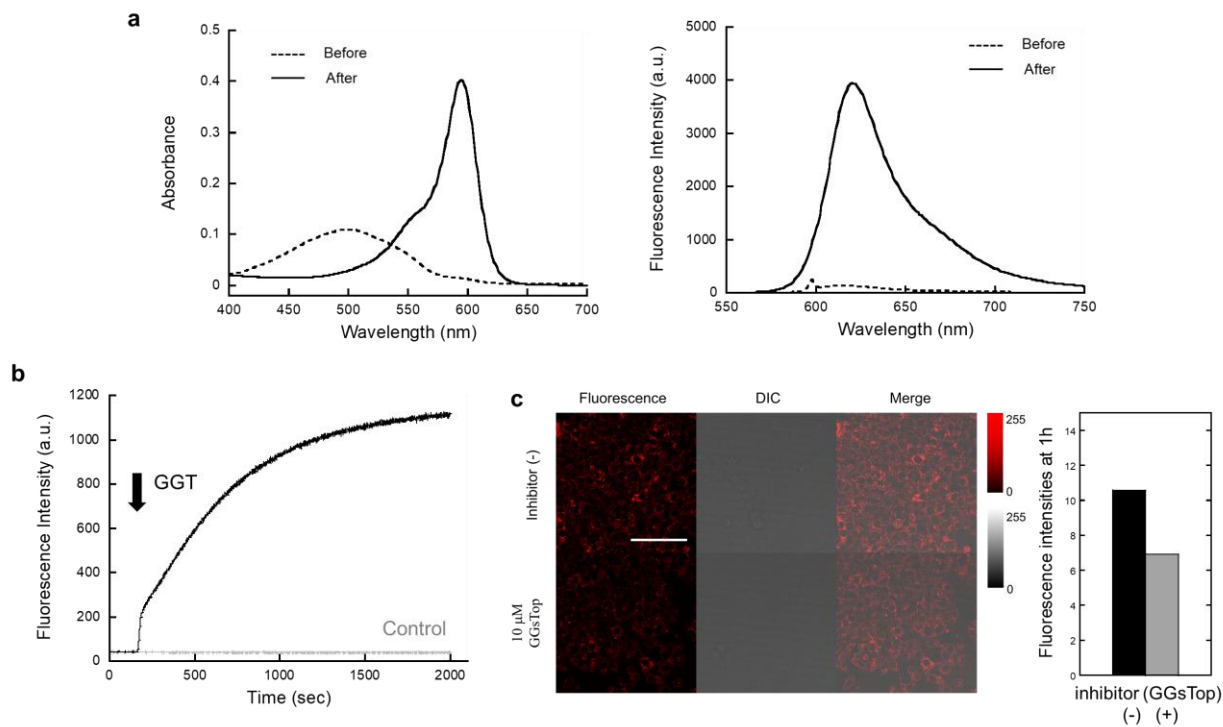

**Figure S18. Red fluorescent probe for GGT activity.** (a) Absorption (left) and fluorescence (right) spectra of gGlu-2OMe SiR600 before and after reaction with GGT. (b) The time course of fluorescence intensity of gGlu-2OMe SiR600 upon addition of GGT was monitored at excitation/emission wavelengths of 595 nm/615 nm. To a 10  $\mu$ M solution of gGlu-2OMe SiR600 in 3 mL of PBS (-), pH 7.4, containing 0.1% DMSO as a cosolvent, GGT (Oriental Yeast Co., Ltd., 50 units) was added at 150 s. The gray line (control) shows the fluorescence change in the absence of GGT. (c) Confocal images of fluorescence intensity in GGT-positive SHIN3 cells<sup>1</sup> treated with gGlu-2OMe SiR600 for 1 h in the presence and absence of GGsTop (left). Fluorescence intensity of SHIN3 cells at 1 h (right). Black bar: fluorescence intensity in the absence of GGsTop. Gray bar: fluorescence intensity in the presence of GGsTop. Ex/Em = 593 nm/600-800 nm. [gGlu-2OMe SiR600] = 1  $\mu$ M, [GGsTop] = 10  $\mu$ M. Scale bar, 100  $\mu$ m.

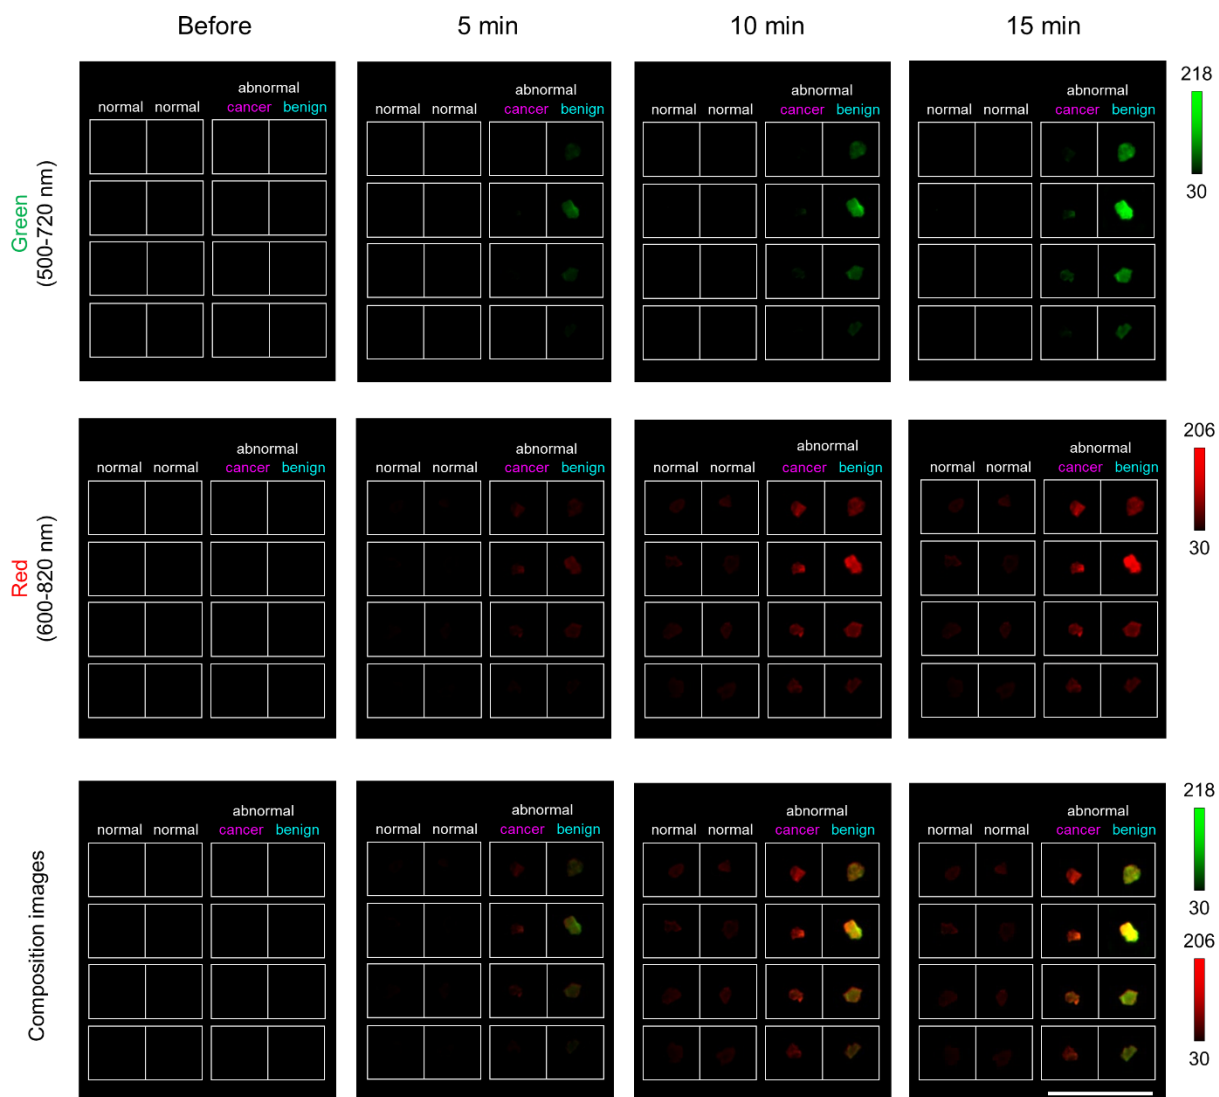

**Figure S19. Time-dependent fluorescence images of human normal, cancer and benign (FA) tissues from human breast after administration of HMRef- $\alpha$ Man and gGlu-2OMe SiR600.** Green channel: pseudo real color image at 500-720 nm. Red channel: pseudo real color image at 600-820 nm. Scale bar, 2 cm.

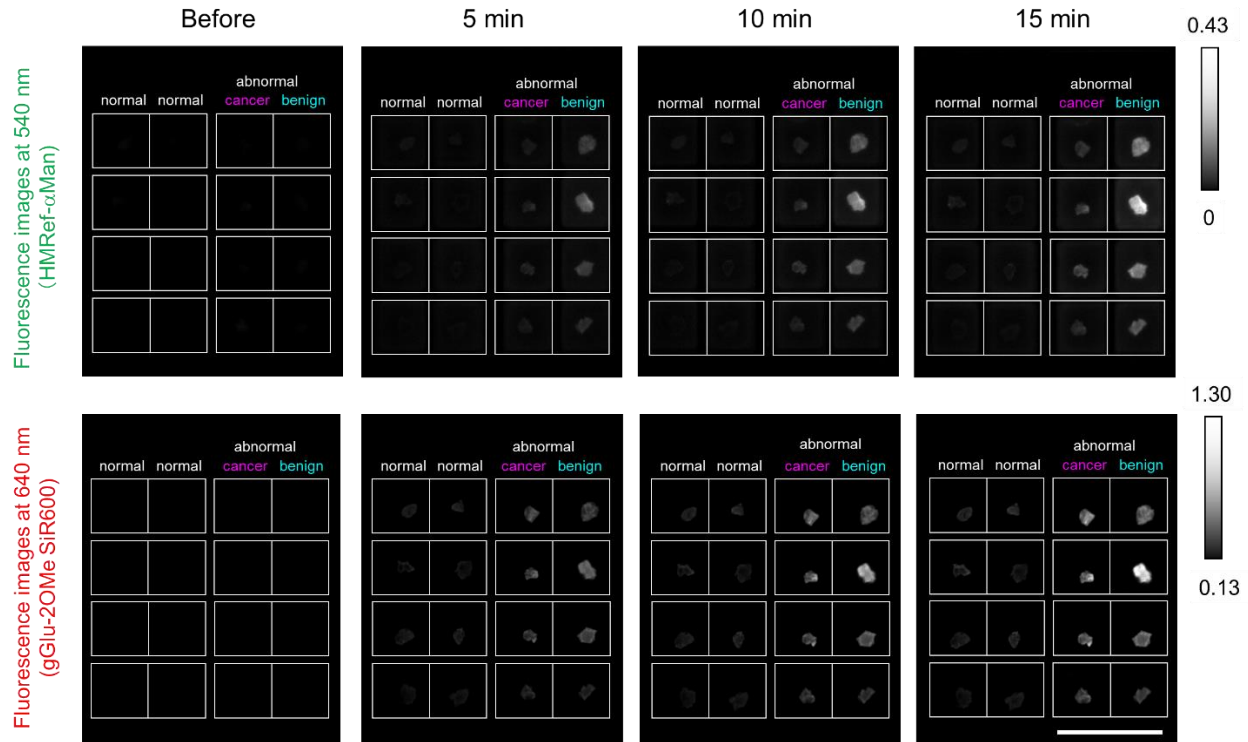

**Figure S20. Time-dependent fluorescence images at 540 nm and 640 nm of normal, cancer and benign (FA) tissues from human breast after administration of HMRef- $\alpha$ Man and gGlu-2OMe SiR600.** Fluorescence at 540 nm is due to the HMRef fluorophore. Fluorescence at 640 nm is due to the 2OMe SiR600 fluorophore. Scale bar, 2 cm.

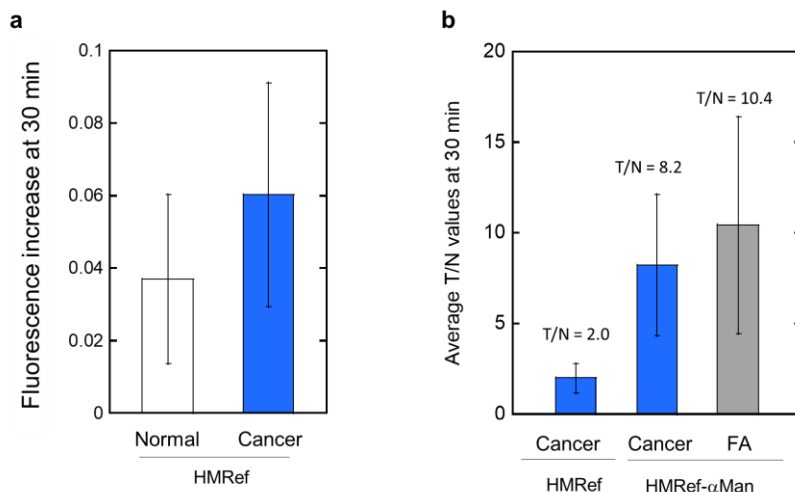

**Figure S21. Fluorescence increase of breast cancer and normal tissues in the presence of HMRef or HMRef- $\alpha$ Man.** (a) Fluorescence increases of normal and IDC tissues from human breast in the presence of HMRef fluorophore. White bar: fluorescence increase in normal tissues (N = 4) from different patients. Blue bar: fluorescent increase in cancer (IDC) tissues (N = 4) from different patients. Fluorescence increase was measured at 30 min after administration of HMRef. The average tumor/non-tumor ratio (T/N) was 2.0, from which we can infer that observed T/N values over 2.0 represent differences of enzyme activity between tumor and non-tumor tissues. Error bars represent s.d. [HMRef] = 1  $\mu$ M. (b) T/N values at 30 min in breast cancer (IDC and DCIS) and benign FA tissues. Average T/N values obtained with HMRef- $\alpha$ Man in breast cancer and benign FA were 8.2 and 10.4, respectively. For HMRef- $\alpha$ Man, breast IDC (N = 7), DCIS (N = 3) and FA (N = 10) tissues were evaluated. T/N values with HMRef- $\alpha$ Man were calculated using the fluorescence increase values shown in **Figure 5 (a)**. Error bars represent s.d. [HMRef- $\alpha$ Man] = 50  $\mu$ M.

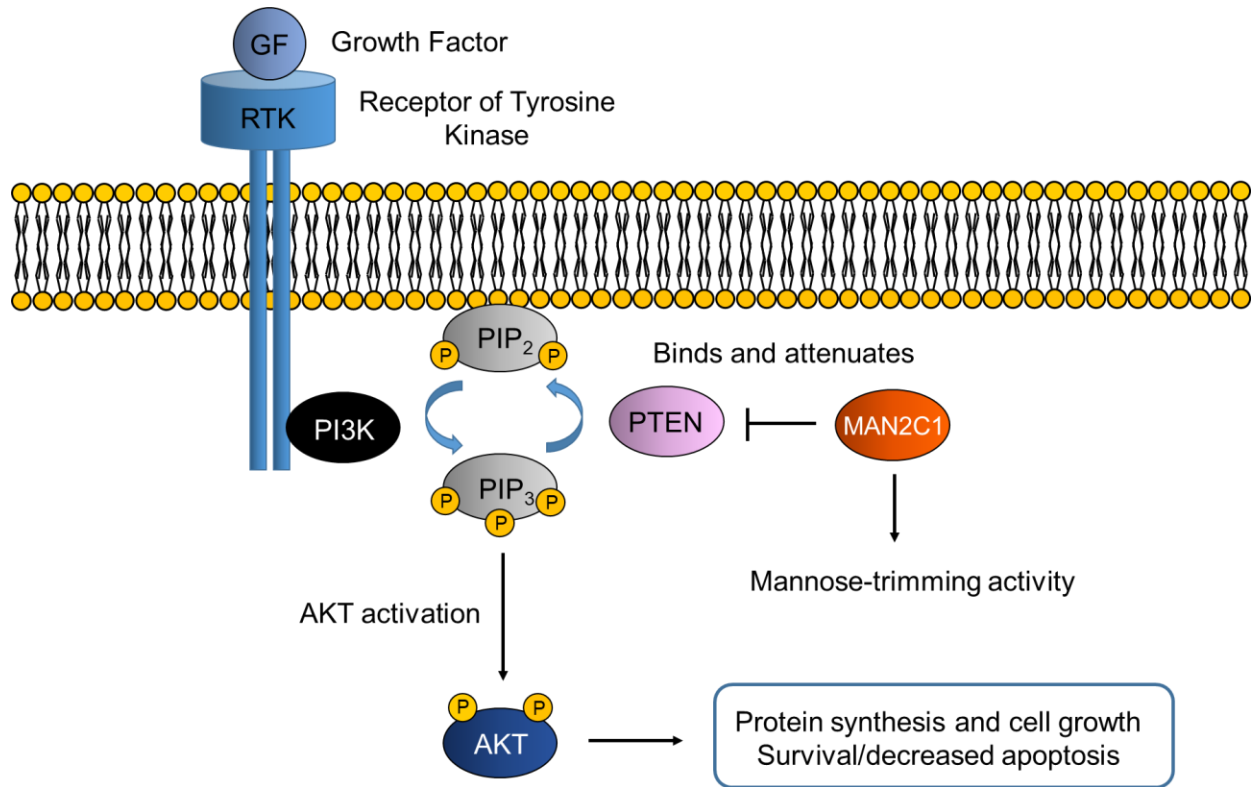

**Figure S22. MAN2C1 attenuates PTEN function.** He *et al.* reported that inactivation of PTEN by MAN2C1 leads to activation of the PI3K/AKT pathway in PTEN-positive prostate cancer. They also demonstrated that MAN2C1 siRNA reduced AKT activation in PTEN-positive DU145 prostate cancer cells, as well as in MCF7 breast cancer cells.<sup>3</sup> MAN2C1 may function similarly in clinical breast cancer specimens, as shown in **Figure S21**.

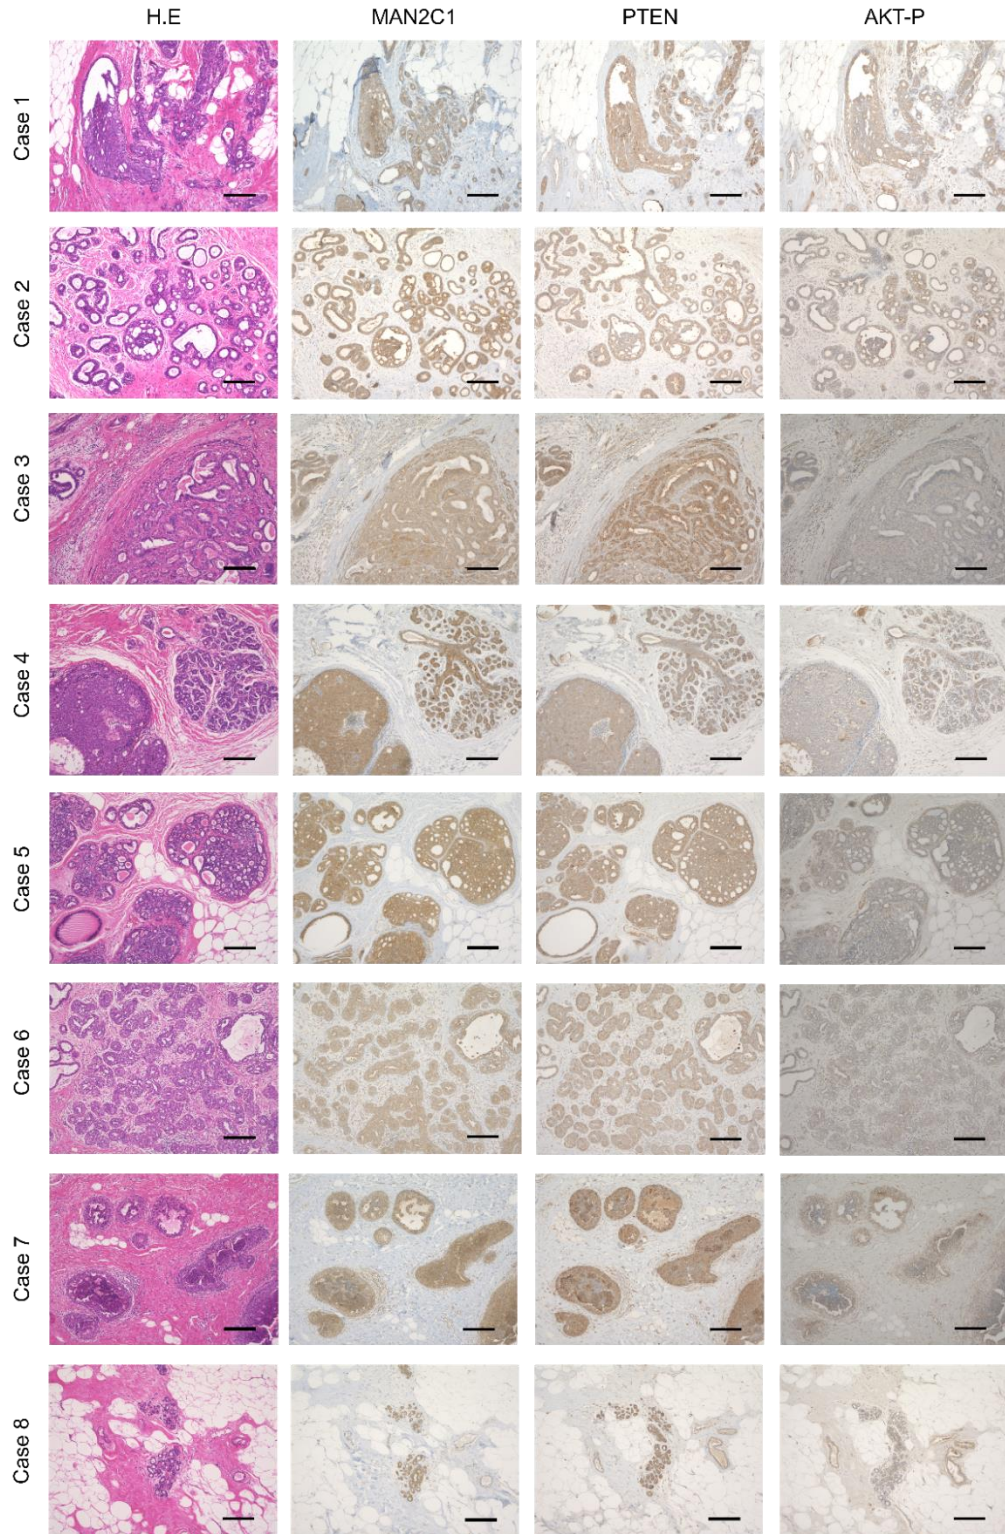

**Figure S23. H.E and IHC staining of DCIS tissue from 8 different patients.** Co-expression of MAN2C1, PTEN and AKT-P (pSer473) was observed in all human DCIS tissues evaluated in this experiment. This feature is similar to the case of PTEN-positive prostate cancer. Scale bar, 200  $\mu$ m.

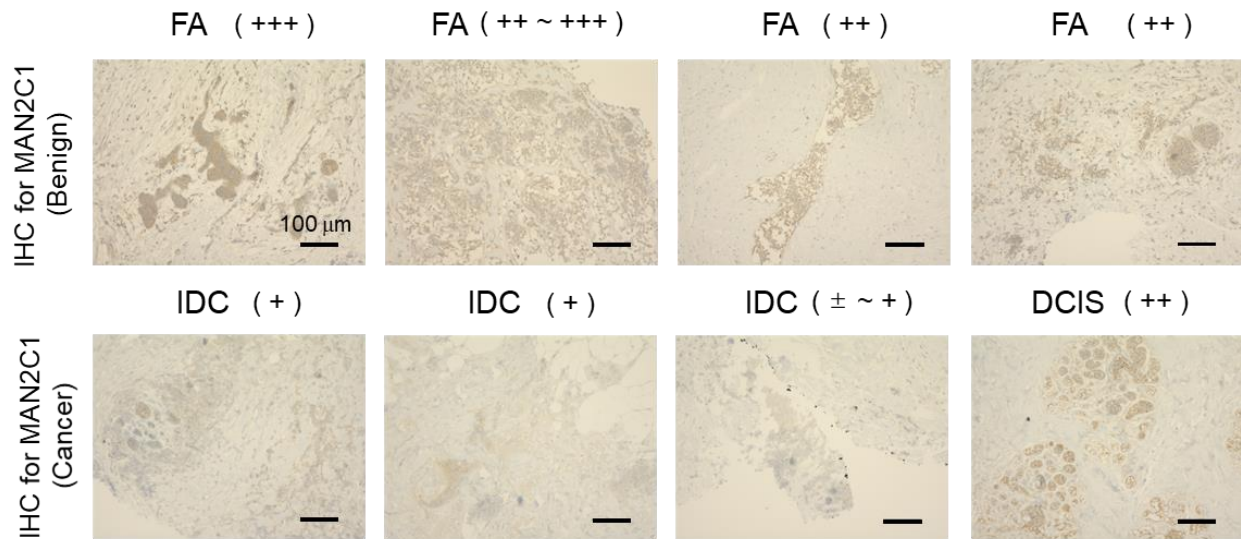

**Figure S24. IHC staining of benign FA and cancer tissues.** Expression levels of MAN2C1 at the tumor regions in the specimens in **Figure 6 (c)** were evaluated in terms of IHC by means of visual scoring by a pathologist (negative “-“, weak “+”, medium “++”, and strong “+++” positive staining). Scores are shown in above each IHC image. Levels of MAN2C1 tend to be higher in benign FA tissues than in cancerous tissues in this experiment. Scale bar, 100  $\mu\text{m}$ .



## Organic synthesis and characterization of compounds.

HMRef was synthesized according to **Scheme 1**.

**Scheme 1.** Synthesis of HMRef fluorophore

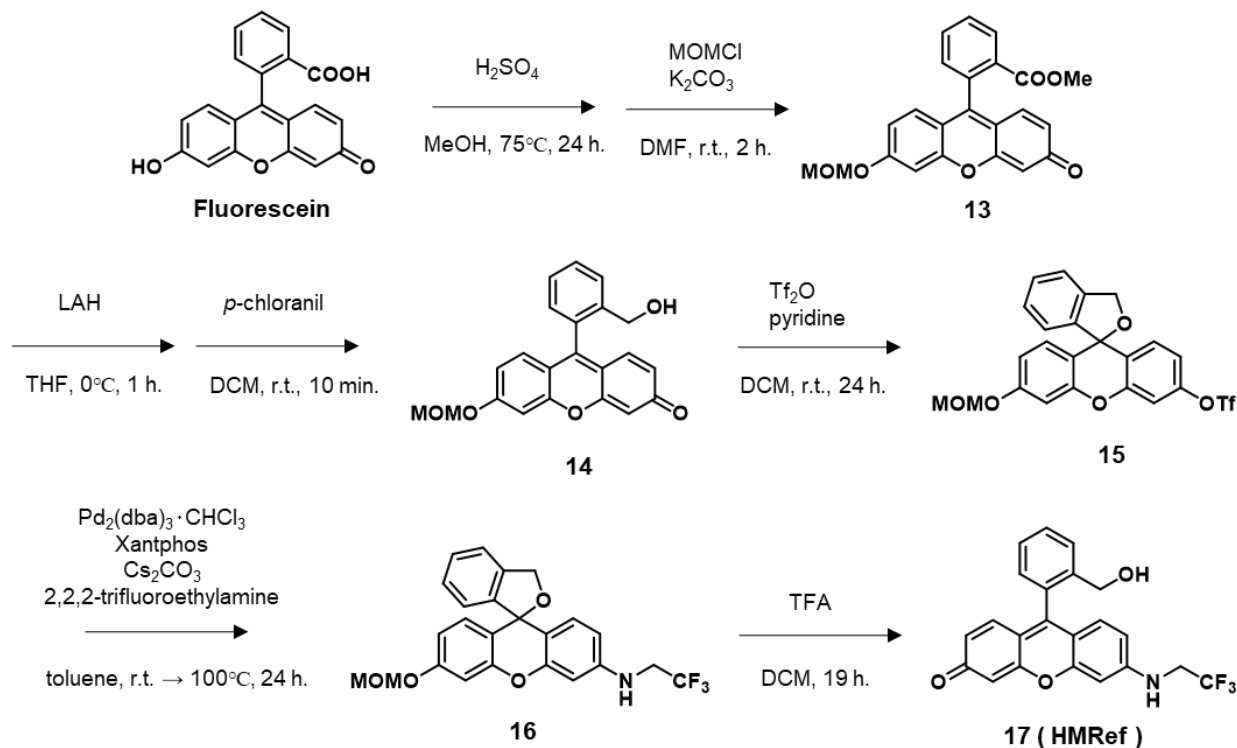

**Procedure for the synthesis of 13.** A mixture of fluorescein (10.0 g, 30.1 mmol) and  $\text{H}_2\text{SO}_4$  (20.0 mL) in 100 mL dried MeOH was stirred for 24 h at  $80^\circ\text{C}$ . The solution was concentrated under reduced pressure and neutralized with sat. aq.  $\text{NaHCO}_3$ . The product was collected by suction filtration, washed with water several times, and extracted with MeOH. The solution was concentrated under reduced pressure to afford an orange-red powder. A mixture of this product, chloromethyl methyl ester (8.48 g, 105 mmol) and  $\text{K}_2\text{CO}_3$  (20.0 g, 144 mmol) in 100 mL dried DMF was stirred for 24 h at room temperature. The solution was concentrated under reduced pressure to remove DMF. To the residue were added DCM and 15.0 mL of sat. aq.  $\text{NH}_4\text{Cl}$ . The mixture was stirred for 10 min, then the aqueous layer was acidified to pH  $\sim 3$  with 85% phosphoric acid, and the organic layer was isolated. The DCM extracts were washed with brine, dried over  $\text{Na}_2\text{SO}_4$ , and filtered. Silica gel 60 was added to the filtrate. After evaporation to dryness, the resulting slurry was applied to a column of silica gel 60 and eluted with ethyl acetate : hexane = 4 : 1 solvent to afford **13** as a yellow powder (11.51 g, 29.5 mmol) in 97.9 % yield. The identity of the product was confirmed by means of  $^1\text{H}$  NMR,  $^{13}\text{C}$  NMR and ESI-HRMS.  $^1\text{H}$  NMR (400 MHz,  $\text{CD}_3\text{OD}$ ):  $\delta$  8.23 (d,  $J = 1.2$  Hz, 1H), 7.88 (t,  $J = 1.2$  Hz, 1H), 7.749-7.39 (m, 12H), 7.16 (d,  $J = 7.2$  Hz, 1H), 6.60-6.56 (m, 6H), 1.08 (s, 18H).  $^{13}\text{C}$  NMR (101 MHz,  $\text{CD}_3\text{OD}$ ):  $\delta$  183.9, 165.1, 161.0, 158.3,

153.1, 149.8, 133.8, 133.2, 130.7, 130.4, 130.0, 129.5, 128.9, 117.0, 115.0, 114.4, 102.7, 94.1, 56.1, 52.3. ESI-HRMS (ESI +) m/z calcd. for [M+H]<sup>+</sup>, 391.11761; found, 391.11690.

**Procedure for the synthesis of 14.** A mixture of **13** (11.5 g, 29.5 mmol) and LAH (800 mg, 21.1 mmol) in 150 mL dried THF was stirred for 2 h in an ice bath. The reaction was quenched by the addition of MeOH, and the mixture was concentrated under reduced pressure. After the addition of Rochelle salt aq. and AcOEt, the whole was stirred for 1 h at room temperature. The organic layer was washed with water and brine, dried over Na<sub>2</sub>SO<sub>4</sub>, and evaporated. The residue was dissolved in 100 mL CH<sub>2</sub>Cl<sub>2</sub>. To this solution, *p*-cloranil (3.20 g, 13.0 mmol) was added, and the mixture was stirred for 10 min at room temperature. The reaction was quenched by the addition of silica gel 60, and the mixture was evaporated to dryness. The resulting slurry was subjected to flash column chromatography (CH<sub>2</sub>Cl<sub>2</sub> : MeOH = 95 : 5) to afford **14** as a yellow powder (5.97 g, 16.5 mmol) in 55.9 % yield. The identity of the product was confirmed by means of ESI-HRMS. ESI-HRMS (ESI +) m/z calcd. for [M+H]<sup>+</sup>, 363.12270; found, 363.12286.

**Procedure for the synthesis of 15.** A mixture of **14** (5.97 g, 16.5 mmol), Tf<sub>2</sub>O (5.80 mL, 30.5 mmol) and pyridine (5.80 mL, 72.0 mmol) in 150 mL dried CH<sub>2</sub>Cl<sub>2</sub> was stirred for 24 h at room temperature, and then evaporated. The residue was purified by flash column chromatography using CH<sub>2</sub>Cl<sub>2</sub> as the eluent to obtain **15** (4.46 g, 9.02 mmol) as a light yellow oil in 54.7% yield. The identity of the product was confirmed by means of <sup>1</sup>H NMR, <sup>13</sup>C NMR and ESI-HRMS. <sup>1</sup>H NMR (400 MHz, CD<sub>2</sub>Cl<sub>2</sub>): δ 7.41-7.45 (m, 2H), 7.30-7.34 (m, 1H), 7.22 (d, *J* = 2.4 Hz, 1H), 7.15 (d, *J* = 8.4 Hz, 1H), 6.71 (dd, *J* = 2.2 Hz, 8.8 Hz, 1H), 7.01 (dd, *J* = 2.4 Hz, 8.8 Hz, 1H), 6.96-6.98 (m, 2H), 6.91 (d, *J* = 7.6 Hz, 1H), 6.81 (dd, *J* = 2.4 Hz, 8.8 Hz, 1H), 5.39 (s, 2H), 5.36 (d, *J* = 1.2 Hz, 1H), 5.23 (s, 2H), 3.49 (s, 3H). <sup>13</sup>C NMR (101 MHz, CD<sub>2</sub>Cl<sub>2</sub>): δ 158.5, 151.4, 151.0, 149.5, 145.0, 139.1, 131.1, 130.0, 128.9, 126.1, 123.8, 121.4, 118.3, 117.5, 116.6, 113.5, 110.2, 103.6, 94.9, 83.2, 73.2, 56.4. ESI-HRMS (ESI +) m/z calcd. for [M+H]<sup>+</sup>, 495.07198; found, 495.06802.

**Procedure for the synthesis of 16.** Compound **15** (2.58 g, 5.22 mmol), Pd<sub>2</sub>(dba)<sub>3</sub>·CHCl<sub>3</sub> (1.87 g, 1.81 mmol), xantphos (610 mg, 1.05 mmol) and Cs<sub>2</sub>CO<sub>3</sub> (4.26 g, 13.1 mmol) were dissolved in 50 mL dried toluene under an Ar atmosphere. 2,2,2-Trifluoroethylamine (3.00 mL) was added dropwise to the reaction solution with intensive stirring. Stirring was continued under an Ar atmosphere, first at room temperature for 30 min and then at 100°C for 24 h. The reaction mixture was allowed to cool to room temperature, diluted with CH<sub>2</sub>Cl<sub>2</sub> and filtered through a Celite pad. After evaporation, the residue was purified by flash column chromatography (CH<sub>2</sub>Cl<sub>2</sub> : MeOH = 99 : 1) to afford the desired product **16** (1.63 g, 3.68 mmol) as a slightly yellow powder in 70.2% yield. The identity of the product was confirmed by means of <sup>1</sup>H NMR, <sup>13</sup>C NMR and ESI-HRMS. <sup>1</sup>H NMR (400 MHz, CDCl<sub>3</sub>): δ 7.26-7.36 (m, 2H), 7.24-7.28 (m, 1H), 6.91-6.88 (m, 2H), 6.84 (d, *J* = 8.8 Hz, 1H),

6.77 (d,  $J = 8.8$  Hz, 1H), 6.71 (dd,  $J = 2.2$  Hz, 8.8 Hz, 1H), 6.48 (d,  $J = 2.4$  Hz, 1H), 6.37 (dd,  $J = 2.4$  Hz, 8.4 Hz, 1H), 5.29 (s, 2H), 5.16 (s, 2H), 4.06 (t,  $J = 7.0$  Hz, 1H), 3.65-3.80 (m, 2H), 3.47 (s, 3H).  $^{13}\text{C}$  NMR (101 MHz,  $\text{CDCl}_3$ ):  $\delta$  157.7, 151.7, 151.4, 147.2, 144.8, 139.4, 130.0, 129.8, 128.3, 128.0, 124.0, 120.6, 118.4, 115.4, 112.4, 109.9, 103.3, 99.2, 94.4, 83.5, 77.2, 56.1, 45.7 (q,  $J = 33.8$  Hz). ESI-HRMS (ESI+)  $m/z$  calcd. for  $[\text{M}+\text{H}]^+$ , 444.14172; found, 444.14146.

**Procedure for the synthesis of 17 (HMRef).** Compound **16** (1.63 g, 3.67 mmol) was dissolved in 30.0 mL of  $\text{CH}_2\text{Cl}_2$ . TFA (10.0 mL) was added dropwise, and the reaction mixture was stirred at room temperature for 19 h. After dilution with  $\text{CH}_2\text{Cl}_2$ , the reaction solution was neutralized with 1 M NaOH, and washed with 1 M NaOH and brine. The organic layer was isolated, dried over  $\text{Na}_2\text{SO}_4$ , filtered, and concentrated to afford **17**, HMRef, (1.26 g, 3.15 mmol) as a red powder in 85.8 % yield. The identity of the product was confirmed by means of  $^1\text{H}$  NMR and ESI-HRMS.  $^1\text{H}$  NMR (400 MHz,  $\text{CD}_3\text{OD} + \text{NaOD}$ ):  $\delta$  7.25-7.27 (m, 2H), 7.14-7.18 (m, 1H), 6.72 (d,  $J = 7.6$  Hz, 1H), 6.51 (d,  $J = 8.8$  Hz, 1H), 6.38 (d,  $J = 8.4$  Hz, 1H), 6.35 (d,  $J = 2.4$  Hz, 1H), 6.26-6.29 (m, 2H), 6.20 (dd,  $J = 2.4$  Hz, 8.4 Hz, 1H), 3.71 (q,  $J = 9.3$  Hz, 2H), 3.20-3.21 (m, 2H). ESI-HRMS (ESI+)  $m/z$  calcd. for  $[\text{M}+\text{H}]^+$ , 400.11605; found, 400.11436.

**Purification of glycosidase-reactive probes by HPLC.** Glycosidase-reactive probes synthesized according to **Schemes 2-13** were purified by reverse-phase HPLC (ODS column, 250 x 20 mm, pore size: 5  $\mu$ m) with a gradient of 5-80% MeCN in water (0.1% TFA) over 90 min (flow rate; 1 mL / min, detection at 250 and 400 nm).

**Scheme 2.** Synthesis of probe **1** ( $\beta$ -D-Glc)

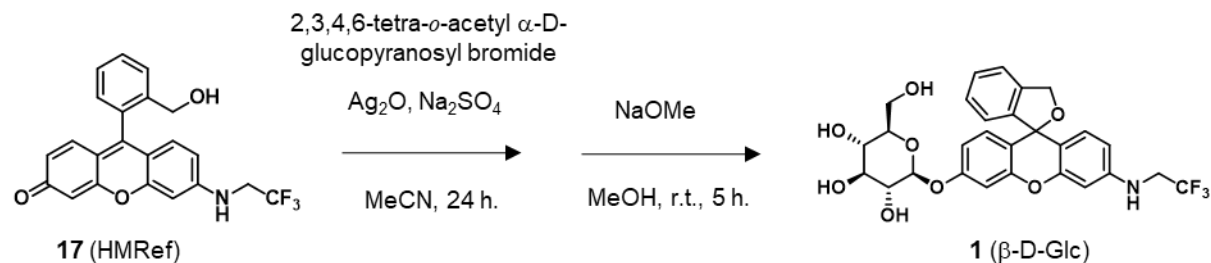

**Procedure for the synthesis of 1 ( $\beta$ -D-Glc).** A mixture of HMRef (0.426 g, 1.07 mmol), 2,3,4,6-tetra-*O*-acetyl  $\alpha$ -D-glucopyranosyl bromide (8.26 g, 20.1 mmol),  $\text{Ag}_2\text{O}$  (4.71 g, 20.3 mmol) and  $\text{Na}_2\text{SO}_4$  (720 mg, 2.00 mmol) in 30.0 mL dried MeCN was stirred at room temperature for 24 h. The reaction mixture was filtrated through a Celite pad, and the filtrate was concentrated under reduced pressure. The residue was purified by flash column chromatography ( $\text{CH}_2\text{Cl}_2$  : MeOH = 95 : 5) to obtain the crude 2,3,4,6-tetra-*O*-acetyl  $\beta$ -D-glucopyranosylated derivative, which was dissolved in 5.00 mL dried MeOH. To this solution, NaOMe (520 mg, 9.63 mmol) dissolved in 5.00 mL dried MeOH was added dropwise, and the reaction mixture was stirred at room temperature for 5 h. The solution was neutralized with Amberlite IR 120, filtered, and concentrated under reduced pressure. The residue was purified by flash column chromatography ( $\text{CH}_2\text{Cl}_2$  : MeOH = 9 : 1) to afford **1 ( $\beta$ -D-Glc)** (301 mg, 0.535 mmol) as a yellow powder in 50.2 % yield. The identity of the product was confirmed by means of  $^1\text{H}$  NMR and ESI-HRMS.  $^1\text{H}$  NMR (400 MHz,  $\text{CD}_3\text{OD}$  + NaOD):  $\delta$  7.38-7.45 (m, 2H), 7.28-7.31 (m, 1H), 6.96 (d,  $J$  = 2.4 Hz, 1H), 6.76-6.87 (m, 3H), 6.71-6.73 (m, 1H), 6.53 (d,  $J$  = 2.4 Hz, 1H), 6.47 (dd,  $J$  = 2.4 Hz, 8.4 Hz, 1H), 5.27 (s, 2H), 4.97 (d,  $J$  = 5.2 Hz, 1H), 3.73-3.94 (m, 4H), 3.20-3.50 (m, overlaps with HOD). ESI-HRMS (ESI +)  $m/z$  calcd. for  $[\text{M}+\text{H}]^+$ , 562.16833; found, 562.16944.

**Scheme 3.** Synthesis of probe **2** ( $\beta$ -D-Gal)

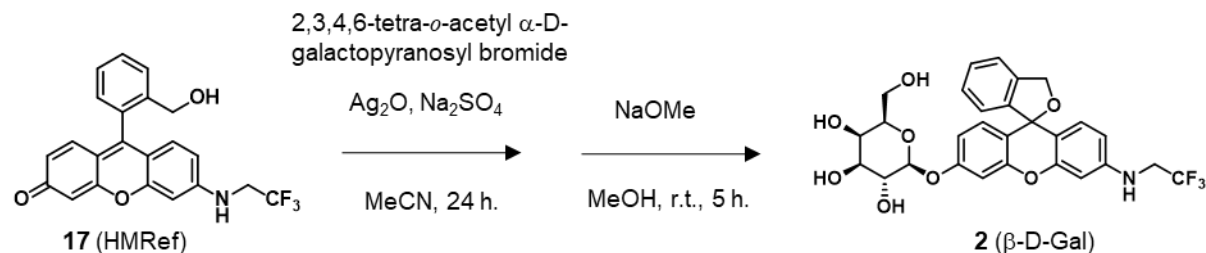

**Procedure for the synthesis of 2 ( $\beta$ -D-Gal).**<sup>4</sup> A mixture of HMRef (329 mg, 0.826 mmol), 2,3,4,6-tetra-*O*-acetyl  $\alpha$ -D-galactopyranosyl bromide (6.76 g, 16.5 mmol), Ag<sub>2</sub>O (3.83 g, 16.5 mmol) and Na<sub>2</sub>SO<sub>4</sub> (500 mg, 3.34 mmol) in 40.0 mL dried MeCN was stirred at room temperature for 24 h. The reaction mixture was filtered through a Celite pad, and the filtrate was concentrated under reduced pressure to obtain the crude 2,3,4,6-tetra-*o*-acetyl  $\beta$ -D-galactopyranosylated derivative, which was dissolved in 10.0 mL dried MeOH. To this solution, NaOMe (2.30 g, 42.6 mmol) dissolved in 20.0 mL dried MeOH was added dropwise. The reaction mixture was stirred at room temperature for 5 h, then neutralized with Amberlite IR 120, filtered, and concentrated under reduced pressure. The residue was purified by flash column chromatography (CH<sub>2</sub>Cl<sub>2</sub> : MeOH = 9 : 1) to afford **2 ( $\beta$ -D-Gal)** (69.1 mg, 0.123 mmol) as a yellow powder in 14.9 % yield. The identity of the product was confirmed by means of ESI-HRMS. ESI-HRMS (ESI +) *m/z* calcd. for [M+H]<sup>+</sup>, 562.16833; found, 562.17008.

**Scheme 4.** Synthesis of probe **3** ( $\beta$ -L-Gal)

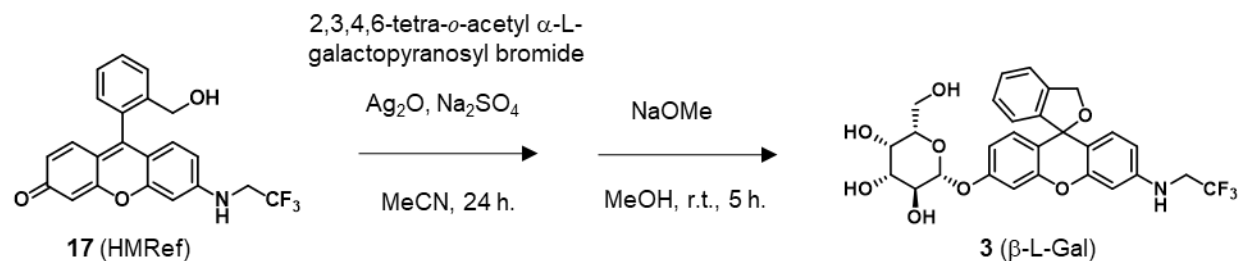

**Procedure for the synthesis of 3 ( $\beta$ -L-Gal).** 2,3,4,6-Tetra-*O*-acetyl  $\alpha$ -L-galactopyranosyl bromide was synthesized according to the reported procedure.<sup>5</sup> A mixture of HMRef (92 mg, 0.230 mmol), 2,3,4,6-tetra-*O*-acetyl  $\alpha$ -L-galactopyranosyl bromide (692 mg, 1.68 mmol), Ag<sub>2</sub>O (430 mg, 1.85 mmol) and Na<sub>2</sub>SO<sub>4</sub> (300 mg, 2.00 mmol) in 10.0 mL dried MeCN was stirred at room temperature for 24 h. The reaction mixture was filtered through a Celite pad, and the filtrate was concentrated under reduced pressure. The residue was dissolved in 15.0 mL dried MeOH. To this solution, NaOMe (900 mg, 16.7 mmol) dissolved in 5.00 mL dried MeOH was added dropwise, and the reaction mixture was stirred at room temperature for 5 h. The solution was neutralized with Amberlite IR 120, filtered, and concentrated under reduced pressure. The residue was purified by flash column chromatography (CH<sub>2</sub>Cl<sub>2</sub> : MeOH = 9 : 1) to afford **3 ( $\beta$ -L-Gal)** (52.7 mg, 0.0937 mmol) as a yellow powder in

40.1 % yield. The identity of the product was confirmed by means of  $^1\text{H}$  NMR and ESI-HRMS.  $^1\text{H}$  NMR (400 MHz,  $\text{CD}_3\text{OD}$ ):  $\delta$  7.40-7.27 (m, 2H), 7.13-7.16 (m, 1H), 6.84 (d,  $J = 2.4$  Hz, 1H), 6.69-6.73 (m, 3H), 6.59 (d,  $J = 8.4$  Hz, 1H), 6.40 (m, 1H), 6.34 (dd,  $J = 2.4$  Hz, 8.8 Hz, 1H), 5.14 (s, 2H), 4.80 (d,  $J = 7.6$  Hz, 1H), 4.23-4.19 (m, 1H), 3.84-3.80 (m, 2H), 3.74-3.55 (m, 7H), 3.52-3.40 (m, overlaps with HOD). ESI-HRMS (ESI +)  $m/z$  calcd. for  $[\text{M}+\text{Na}]^+$ , 584.15027; found, 584.15074.

**Scheme 5.** Synthesis of probe **4** ( $\beta$ -D-Xyl)

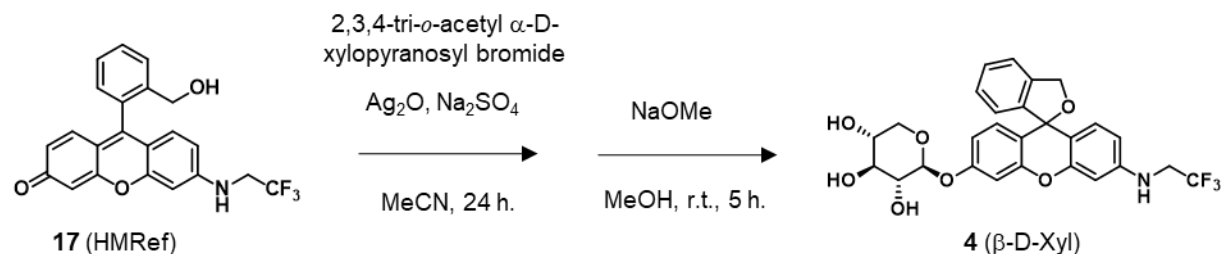

**Procedure for the synthesis of 4 ( $\beta$ -D-Xyl).** 2,3,4-Tri-*O*-acetyl  $\alpha$ -D-xylopyranosyl bromide was synthesized according to the a literature reported procedure.<sup>6</sup> A mixture of **17** (107 mg, 0.268 mmol), 2,3,4-tri-*O*-acetyl  $\alpha$ -D-xylopyranosyl bromide (3.10 g, 9.17 mmol),  $\text{Ag}_2\text{O}$  (2.10 g, 9.05 mmol) and  $\text{Na}_2\text{SO}_4$  (500 mg, 3.34 mmol) in 25.0 mL dried MeCN was stirred at room temperature for 24 h. The reaction mixture was filtered through a Celite pad, and the filtrate was concentrated under reduced pressure. The residue was purified by flash column chromatography ( $\text{CH}_2\text{Cl}_2$  : MeOH = 95 : 5) to afford the crude 2,3,4-tri-*O*-acetyl  $\beta$ -D-xylopyranosylated derivative, which was dissolved in 40.0 mL dried MeOH. To this solution, NaOMe (1.03 g, 19.1 mmol) dissolved in 5.00 mL dried MeOH was added dropwise, and the reaction mixture was stirred at room temperature for 5 h. The solution was neutralized with Amberlite IR 120, filtered, and concentrated under reduced pressure. The residue was purified by flash column chromatography ( $\text{CH}_2\text{Cl}_2$  : MeOH = 9 : 1) to afford **4** ( $\beta$ -D-Xyl) (14.8 mg, 0.0279 mmol) as a yellow powder in 10.4 % yield. The identity of the product was confirmed by means of  $^1\text{H}$  NMR and ESI-HRMS.  $^1\text{H}$  NMR (400 MHz,  $\text{CD}_3\text{OD}$ ):  $\delta$  7.40-7.43 (m, 2H), 7.29-7.31 (m, 1H), 6.92 (d,  $J = 2.4$  Hz, 1H), 6.78-6.85 (m, 3H), 6.71-6.73 (d,  $J = 8.4$  Hz 1H), 6.54 (d,  $J = 2.4$  Hz, 1H), 6.47 (dd,  $J = 2.4$  Hz, 8.4 Hz, 1H), 5.27 (s, 2H), 4.91 (d,  $J = 7.6$  Hz, 1H), 3.53-3.89 (m, 6H), 3.30-3.50 (m, overlaps with  $\text{CD}_3\text{OD}$ ), 1.33 (dd,  $J = 5.2$  Hz, 6.8 Hz, 3H). ESI-HRMS (ESI +)  $m/z$  calcd. for  $[\text{M}+\text{H}]^+$ , 532.15776; found, 532.15765.

**Scheme 6.** Synthesis of probe **5** ( $\alpha$ -D-Man) (HMRef- $\alpha$ Man)

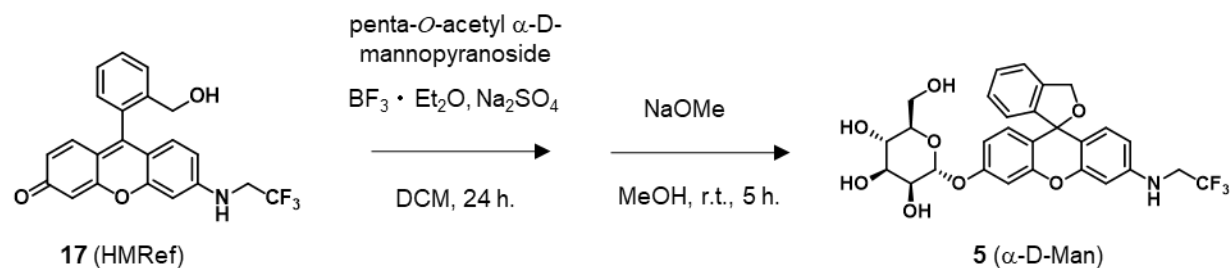

**Procedure for the synthesis of 5 ( $\alpha$ -D-Man).** A mixture of HMRef (96.0 mg, 0.24 mmol), penta-*O*-acetyl-D-mannopyranoside (3.33 g, 8.53 mmol), boron trifluoride diethyl ether complex (8.0 mL, 63.4 mmol) and  $\text{Na}_2\text{SO}_4$  (500 mg, 3.52 mmol) in 15 mL dried DCM was stirred at room temperature for 24 h. The reaction mixture was filtered through a Celite pad, and the filtrate was washed with 1 M NaOH and brine, dried over  $\text{Na}_2\text{SO}_4$  and concentrated under reduced pressure. The residue was dissolved in 15.0 mL dried MeOH. To this solution, NaOMe (1.60 g, 29.6 mmol) dissolved in 5.0 mL dried MeOH was added dropwise, and the reaction mixture was stirred at room temperature for 5 h. The solution was neutralized with Amberlite IR 120, filtered, and concentrated under reduced pressure. The residue was purified by flash column chromatography ( $\text{CH}_2\text{Cl}_2$  : MeOH = 9 : 1) and HPLC to afford **5** ( $\alpha$ -D-Man) (61.6 mg, 0.200 mmol) as a yellow powder in 45.6 % yield. The identity of the product was confirmed by means of  $^1\text{H}$  NMR and ESI-HRMS.  $^1\text{H}$  NMR (400 MHz,  $\text{CD}_3\text{OD}+\text{NaOD}$ ):  $\delta$  7.29-7.42 (m, 2H), 7.17-7.19 (m, 1H), 6.88 (t,  $J = 2.8$  Hz, 1H), 6.67-6.75 (m, 3H), 6.60 (dd,  $J = 2.4$  Hz, 8.8 Hz, 1H), 6.41 (d,  $J = 2.4$  Hz, 1H), 6.36 (dd,  $J = 2.4$  Hz, 8.4 Hz, 1H), 5.44 (d,  $J = 1.6$  Hz, 1H), 5.14 (s, 2H), 3.91-3.93 (m, 1H), 3.63-3.82 (m, 7H), 3.46-3.51 (m, 1H), 1.19 (m, 1H). ESI-HRMS (ESI +)  $m/z$  calcd. for  $[\text{M}+\text{H}]^+$ , 562.16833; found, 562.17027.

**Scheme 7.** Synthesis of probe **6** ( $\beta$ -D-Fuc)

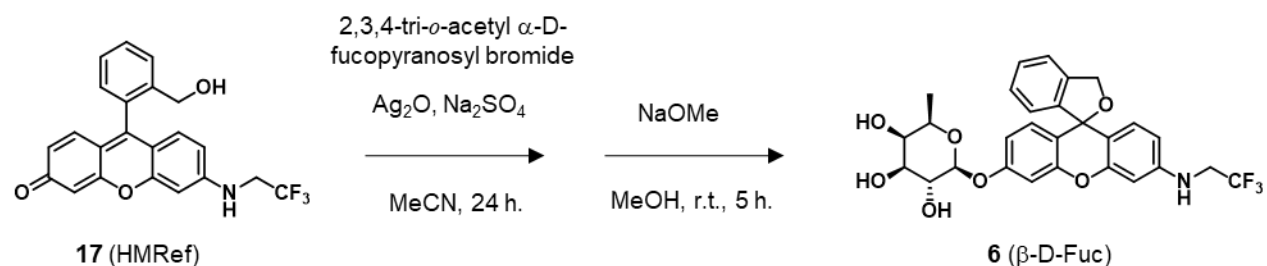

**Procedure for the synthesis of 6 ( $\beta$ -D-Fuc).** 2,3,4-Tri-*O*-acetyl  $\alpha$ -D-fucopyranosyl bromide was synthesized according to the reported procedure.<sup>7</sup> A mixture of HMRef (62.0 mg, 0.155 mmol), 2,3,4-tri-*O*-acetyl  $\alpha$ -D-fucopyranosyl bromide (2.54 g, 7.22 mmol),  $\text{Ag}_2\text{O}$  (1.72 g, 7.38 mmol) and  $\text{Na}_2\text{SO}_4$  (400 mg, 2.67 mmol) in 25.0 mL dried MeCN was stirred at room temperature in the dark for 24 h. The mixture was filtered through a

Celite pad, and the filtrate was concentrated under reduced pressure. The residue was dissolved in 25.0 mL dried MeOH. To this solution, NaOMe (1.54 g, 28.5 mmol) dissolved in 5.00 mL dried MeOH was added dropwise, and the reaction mixture was stirred at room temperature for 5 h. The solution was neutralized with Amberlite IR 120, filtered, and concentrated under reduced pressure. The sample was dissolved in CH<sub>2</sub>Cl<sub>2</sub>, washed with water and brine, dried over Na<sub>2</sub>SO<sub>4</sub>, and concentrated. The residue was purified by flash column chromatography (CH<sub>2</sub>Cl<sub>2</sub> : MeOH = 9 : 1) to afford **6 (β-D-Fuc)** (71.2 mg, 0.131 mmol) as a yellow powder in 84.2 % yield. The identity of the product was confirmed by means of <sup>1</sup>H NMR and ESI-HRMS. <sup>1</sup>H NMR (400 MHz, CD<sub>3</sub>OD): δ 7.20-7.42 (m, 2H), 7.29-7.31 (m, 1H), 6.92 (d, *J* = 2.4 Hz, 1H), 6.82-6.85 (m, 3H), 6.71 (d, *J* = 8.4 Hz, 1H), 6.54 (d, *J* = 2.4 Hz, 1H), 6.46 (dd, *J* = 2.4 Hz, 8.4 Hz, 1H), 5.26 (s, 2H), 4.92 (d, overlaps with HOD), 3.69-3.84 (m, 4H), 3.59-3.61 (m, 1H), 3.33-3.38 (m, overlaps with CD<sub>3</sub>OD), 1.32 (dd, *J* = 3.6 Hz, 6.4 Hz, 3H). ESI-HRMS (ESI +) *m/z* calcd. for [M+Na]<sup>+</sup>, 568.15536; found, 568.15717.

**Scheme 8.** Synthesis of probe **7** (α-L-Fuc)

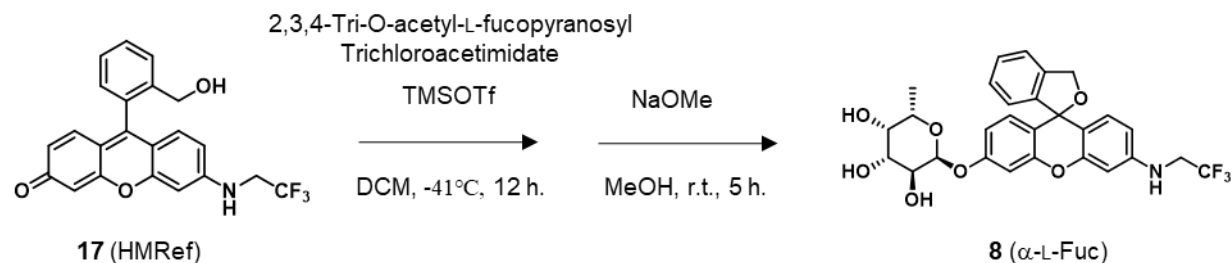

**Procedure for the synthesis of 7 (α-L-Fuc).** 2,3,4-Tri-O-acetyl-L-fucopyranosyl trichloroacetimidate was synthesized according to the reported procedure.<sup>8</sup> A mixture of **17** (90.0 mg, 0.226 mmol), 2,3,4-Tri-O-acetyl-L-fucopyranosyl trichloroacetimidate (862 mg, 1.99 mmol), and TMSOTf (442 mg, 1.99 mmol) in 10.0 mL dried CH<sub>2</sub>Cl<sub>2</sub> was stirred at -41°C for 12 h. The reaction mixture was diluted with CH<sub>2</sub>Cl<sub>2</sub> and neutralized with sat. NaHCO<sub>3</sub> aq. The organic layer was washed with water and brine, dried over Na<sub>2</sub>SO<sub>4</sub>, and concentrated under reduced pressure. The residue was purified by flash column chromatography to afford the crude 2,3,4-tri-O-acetyl-L-fucopyranosylated derivative, which was dissolved in 5.00 mL dried MeOH. To this solution, NaOMe (1.33 g, 24.6 mmol) dissolved in 5.00 mL dried MeOH was added dropwise, and the reaction mixture was stirred at room temperature for 5 h. The solution was neutralized with Amberlite IR 120, filtered, and concentrated under reduced pressure. The residue was purified by flash column chromatography (CH<sub>2</sub>Cl<sub>2</sub> : MeOH = 95 : 5) and HPLC to afford **7 (α-L-Fuc)** (14.4 mg, 0.0257 mmol) as a yellow powder in 11.7 % yield. The identity of the product was confirmed by means of <sup>1</sup>H NMR and ESI-HRMS. <sup>1</sup>H NMR (400 MHz, CD<sub>3</sub>OD): δ 7.29-7.32 (m, 2H), 7.18-7.19 (m, 1H), 6.87 (d, *J* = 2.0 Hz, 1H), 6.67-6.80 (m, 3H), 6.59-6.61 (d, *J* = 8.4 Hz, 1H), 6.42 (d, *J* = 2.4 Hz, 1H), 6.35 (dd, *J* = 2.4 Hz, 8.4 Hz, 1H), 5.41 (d, *J* = 3.2 Hz, 1H), 5.15 (s, 2H), 3.38-3.85 (m, 6H), 3.03-3.30 (m, overlaps with CD<sub>3</sub>OD), 1.21 (dd, *J* = 5.2 Hz, 6.8 Hz, 3H), 1.09 (d, *J* = 6.4 Hz, 2H). ESI-HRMS (ESI +) *m/z* calcd. for [M+H]<sup>+</sup>, 546.17341; found, 546.17449.



**Scheme 9.** Synthesis of probe **8** ( $\beta$ -L-Fuc)

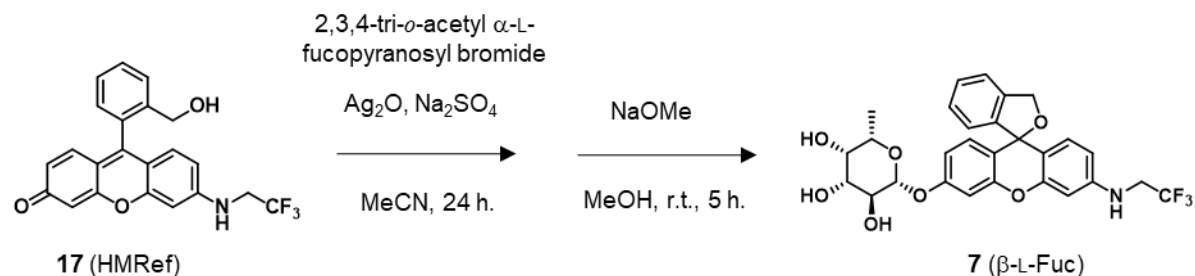

**Procedure for the synthesis of 8 ( $\beta$ -L-Fuc).** 2,3,4-Tri-*O*-acetyl  $\alpha$ -L-fucopyranosyl bromide was synthesized according to the reported procedure.<sup>9</sup> A mixture of HMRef (150 mg, 0.453 mmol), 2,3,4-tri-*O*-acetyl  $\alpha$ -L-fucopyranosyl bromide (3.20 g, 9.09 mmol),  $\text{Ag}_2\text{O}$  (2.11 g, 9.05 mmol) and  $\text{Na}_2\text{SO}_4$  (500 mg, 3.34 mmol) in 25.0 mL dried MeCN was stirred at room temperature in the dark for 24 h. The reaction mixture was filtered through a Celite pad, and the filtrate was concentrated under reduced pressure. The residue was purified by flash column chromatography ( $\text{CH}_2\text{Cl}_2$  : MeOH = 95 : 5) to afford the crude 2,3,4-tri-*O*-acetyl  $\beta$ -L-fucopyranosylated derivative, which was dissolved in 15.0 mL dried MeOH. To this solution, NaOMe (320 mg, 5.93 mmol) dissolved in 5.00 mL dried MeOH was added dropwise, and the reaction mixture was stirred at room temperature for 5 h. The solution was neutralized with Amberlite IR 120, filtered, and concentrated under reduced pressure. The residue was purified by flash column chromatography ( $\text{CH}_2\text{Cl}_2$  : MeOH = 9 : 1) to afford **8 ( $\beta$ -L-Fuc)** (140 mg, 0.257 mmol) as a yellow powder in 56.8 % yield. The identity of the product was confirmed by means of  $^1\text{H}$  NMR and ESI-HRMS.  $^1\text{H}$  NMR (400 MHz,  $\text{CD}_3\text{OD}$ ):  $\delta$  7.40-7.43 (m, 2H), 7.29-7.31 (m, 1H), 6.92 (d,  $J$  = 2.4 Hz, 1H), 6.78-6.85 (m, 3H), 6.72 (d,  $J$  = 8.4 Hz, 1H), 6.54 (d,  $J$  = 2.4 Hz, 1H), 6.47 (dd,  $J$  = 2.4 Hz, 8.4 Hz, 1H), 5.27 (s, 2H), 4.91 (d,  $J$  = 7.6 Hz, 1H), 3.53-3.89 (m, 6H), 3.30-3.50 (m, overlaps with  $\text{CD}_3\text{OD}$ ), 1.33 (dd,  $J$  = 3.6 Hz, 6.8 Hz, 3H). ESI-HRMS (ESI +)  $m/z$  calcd. for  $[\text{M}+\text{Na}]^+$ , 568.15536; found, 568.15638.

**Scheme 10.** Synthesis of probe **9** ( $\alpha$ -D-Ara)

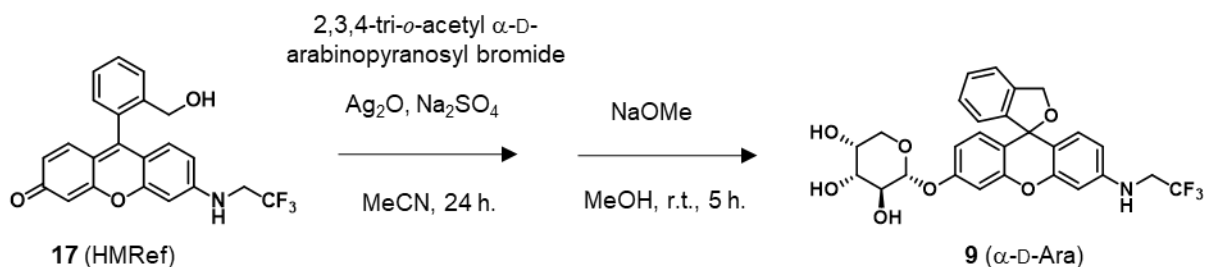

**Procedure for the synthesis of 9 ( $\alpha$ -D-Ara).** 2,3,4-Tri-*O*-acetyl- $\beta$ -D-arabinopyranosyl bromide was synthesized according to the reported procedure.<sup>10</sup> A mixture of HMRef (85.3 mg, 0.214 mmol), crude 2,3,4-tri-*O*-acetyl  $\beta$ -D-arabinopyranosyl bromide (2.94 g), Ag<sub>2</sub>O (1.70 g, 7.33 mmol) and Na<sub>2</sub>SO<sub>4</sub> (700 mg, 4.93 mmol) in 10.0 mL dried MeCN was stirred at room temperature for 24 h. The reaction mixture was filtered through a Celite pad, and the filtrate was concentrated under reduced pressure. The residue was dissolved in 15.0 mL dried MeOH. To this solution, NaOMe (800 mg, 14.8 mmol) dissolved in 5.00 mL dried MeOH was added dropwise, and the reaction mixture was stirred at room temperature for 5 h. The solution was neutralized with Amberlite IR 120, filtered, and concentrated under reduced pressure. The residue was purified by flash column chromatography (CH<sub>2</sub>Cl<sub>2</sub> : MeOH = 9 : 1) to afford **9 ( $\alpha$ -D-Ara)** (52.8 mg, 0.0994 mmol) as a yellow powder in 46.4 % yield. The identity of the product was confirmed by means of <sup>1</sup>H NMR and ESI-HRMS. <sup>1</sup>H NMR (400 MHz, CD<sub>3</sub>OD + K<sub>2</sub>CO<sub>3</sub>):  $\delta$  7.27-7.32 (m, 2H), 7.16-7.18 (m, 1H), 6.80 (d, *J* = 2.4 Hz, 1H), 6.70-6.74 (m, 3H), 6.66 (m, 1H), 6.59 (d, *J* = 9.2 Hz, 1H), 6.41 (d, *J* = 2.0 Hz, 1H), 6.34 (dd, *J* = 2.4 Hz, 8.8 Hz, 1H), 5.14 (s, 2H), 4.79 (d, overlaps with HOD), 3.69-3.85 (m, 5H), 3.60-3.64 (m, 1H), 3.55 (dd, *J* = 3.6 Hz, 9.2 Hz, 1H). ESI-HRMS (ESI +) *m/z* calcd. for [M+Na]<sup>+</sup>, 554.13971; found, 554.14023.

**Scheme 11.** Synthesis of probe **10** ( $\alpha$ -L-Ara)

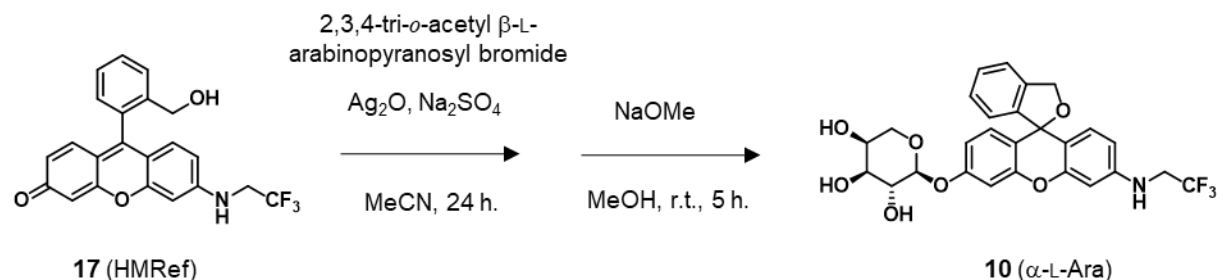

**Procedure for the synthesis of 10 ( $\alpha$ -L-Ara).** 2,3,4-Tri-*O*-acetyl- $\beta$ -L-arabinopyranosyl bromide was synthesized according to the reported procedure.<sup>10</sup> A mixture of HMRef (84.0 mg, 0.211 mmol), 2,3,4-tri-*O*-acetyl- $\beta$ -L-arabinopyranosyl bromide (1.09 mg),  $\text{Ag}_2\text{O}$  (747 mg, 3.21 mmol) and  $\text{Na}_2\text{SO}_4$  (520 mg, 3.66 mmol) in 10.0 mL dried MeCN was stirred at room temperature for 24 h. The reaction mixture was filtered through a Celite pad, and the filtrate was concentrated under reduced pressure. The residue was dissolved in 15.0 mL dried MeOH. To this solution, NaOMe (500 mg, 9.26 mmol) dissolved in 5.00 mL dried MeOH was added dropwise, and the reaction mixture was stirred at room temperature for 5 h. The solution was neutralized with Amberlite IR 120, filtered, and concentrated under reduced pressure. The residue was purified by flash column chromatography ( $\text{CH}_2\text{Cl}_2$  : MeOH = 9 : 1) to afford **10 ( $\alpha$ -L-Ara)** (27.1 mg, 0.0994 mmol) as a yellow powder in 24.2 % yield.  $^1\text{H}$  NMR (400 MHz,  $\text{CD}_3\text{OD}$  +  $\text{K}_2\text{CO}_3$ ):  $\delta$  7.39-7.43 (m, 2H), 7.26-7.32 (m, 1H), 6.92 (d,  $J$  = 2.4 Hz, 1H), 6.83-6.86 (m, 2H), 6.75-6.80 (m, 1H), 6.71 (d,  $J$  = 8.8 Hz, 1H), 6.53 (d,  $J$  = 2.4 Hz, 1H), 6.47 (dd,  $J$  = 2.4 Hz, 8.8 Hz, 1H), 5.26 (s, 2H), 4.91 (d,  $J$  = 7.2 Hz, 1H), 3.93-3.98 (m, 1H), 3.81-3.91 (m, 4H), 3.72-3.76 (m, 1H), 3.66 (dd,  $J$  = 3.2 Hz, 8.8 Hz, 1H). ESI-HRMS (ESI +)  $m/z$  calcd. for  $[\text{M}+\text{Na}]^+$ , 554.13971; found, 554.14035.

**Scheme 12.** Synthesis of probe **11** ( $\beta$ -D-GlcNAc)

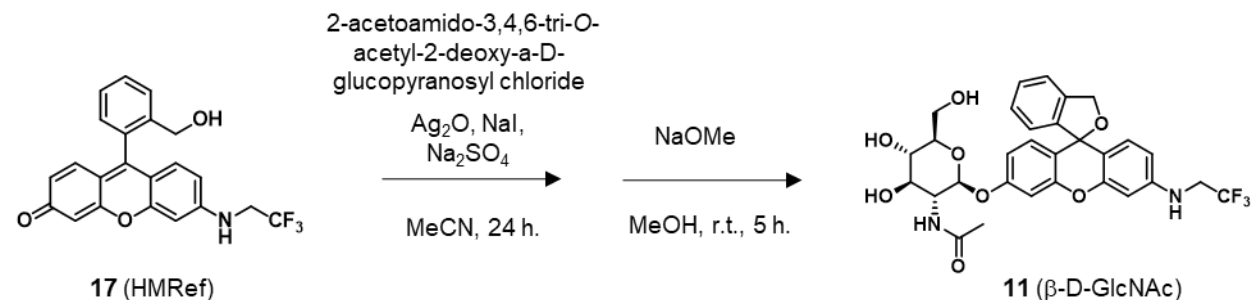

**Procedure for the synthesis of 11 ( $\beta$ -D-GlcNAc).** Compound **11 ( $\beta$ -D-GlcNAc)** was synthesized according to the reported procedure.<sup>11</sup>

**Scheme 13.** Synthesis of probe **12** ( $\beta$ -D-GalNAc)

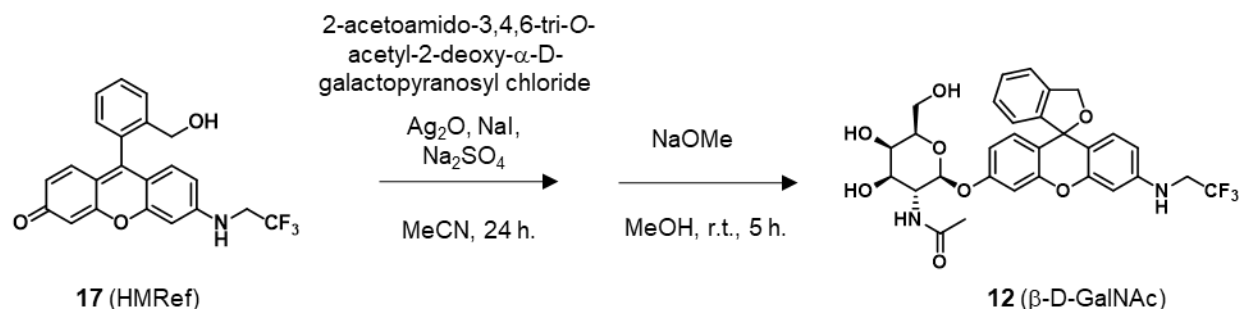

**Procedure for the synthesis of 12 ( $\beta$ -D-GalNAc).** 2-Acetoamide-3,4,6-tri-*O*-acetyl-2-deoxy- $\alpha$ -D-galactopyranosyl chloride was synthesized according to the reported procedure.<sup>12</sup> A mixture of HMRef (46.7 mg, 0.117 mmol), 2-acetoamide-3,4,6-tri-*O*-acetyl-2-deoxy- $\alpha$ -D-galactopyranosyl chloride (400 mg, 1.09 mmol), Ag<sub>2</sub>O (400 mg, 1.72 mmol), NaI (88.3 mg, 0.589 mmol) and Na<sub>2</sub>SO<sub>4</sub> (500 mg, 3.34 mmol) in 10 mL dried MeCN was stirred at room temperature for 24 h. The reaction mixture was filtered through a Celite pad, and the filtrate was concentrated under reduced pressure to give the crude 2-acetoamide-3,4,6-tri-*O*-acetyl-2-deoxy- $\beta$ -D-galactopyranosylated derivative, which was dissolved in 10 mL dried MeOH. To this solution, NaOMe (500 mg, 9.25 mmol) dissolved in 5 mL dried MeOH was added dropwise, and the reaction mixture was stirred at room temperature for 5 h. The solution was neutralized with Amberlite IR 120, filtered, and concentrated under reduced pressure. The residue was subjected into flash column chromatography (CH<sub>2</sub>Cl<sub>2</sub> : MeOH = 8 : 2) to remove unreacted sugars and salts. The crude product was purified by HPLC to afford **12 ( $\beta$ -D-GalNAc)** (11.3 mg, 0.0216 mmol) as a yellow powder in 28.2 % yield. The identity of the product was confirmed by means of <sup>1</sup>H NMR and ESI-HRMS. <sup>1</sup>H NMR (400 MHz, CD<sub>3</sub>OD + K<sub>2</sub>CO<sub>3</sub>):  $\delta$  7.28-7.33 (m, 2H), 7.17-7.19 (m, 1H), 6.78 (d, *J* = 2.4 Hz, 1H), 6.68-6.74 (m, 2H), 6.59-6.63 (m, 2H), 6.40 (d, *J* = 2.4 Hz, 1H), 6.35 (dd, *J* = 2.4 Hz, 8.4 Hz, 1H), 5.14 (s, 2H), 4.95 (d, *J* = 8.4 Hz, 1H), 4.07-4.12 (m, 1H), , 3.83 (d, *J* = 3.2 Hz, 1H), 3.56-3.77 (m, 6H), 3.25 (s, 4H), 1.88 (d, *J* = 2.8 Hz, 3H). ESI-HRMS (ESI +) *m/z* calcd. for [M+Na]<sup>+</sup>, 625.17682; found, 625.17727.

**Scheme 14.** Synthesis of gGlu-2OMe-SiR600.

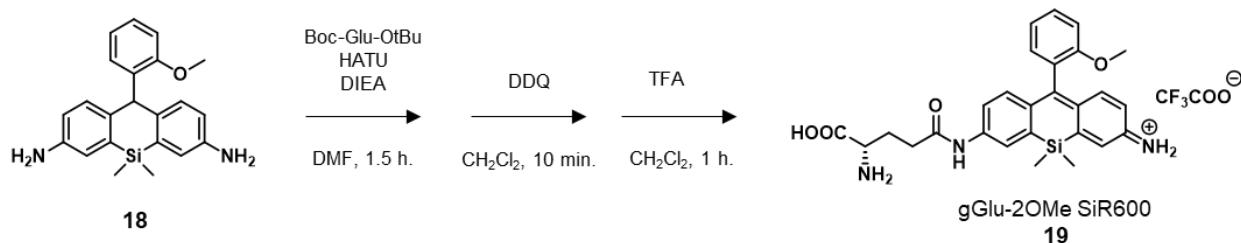

**Procedure for the synthesis of 19 (gGlu-2OMe SiR600).** Compound **18** was synthesized according to the reported procedure.<sup>13</sup> A solution of **18** (60.0 mg, 0.167 mmol), Boc-Glu-OtBu (26.0 mg, 0.0857 mmol), HATU (31.0 mg, 0.0816 mmol) and diisopropylethylamine (DIEA) (71  $\mu$ L, 0.417 mmol) in 6 mL DMF was stirred at r.t. for 1.5 h, and then concentrated under reduced pressure. The residue was dissolved in CH<sub>2</sub>Cl<sub>2</sub>. The organic layer was washed with H<sub>2</sub>O and brine, dried over Na<sub>2</sub>SO<sub>4</sub>, and concentrated. The residue was dissolved in 8 mL CH<sub>2</sub>Cl<sub>2</sub>. To this solution was added 2,3-dichloro-5,6-dicyano-p-benzoquinone (DDQ) (76.0 mg, 0.335 mmol). The mixture was stirred at room temperature for 10 min, and then evaporated. The residue was dissolved in 3 mL CH<sub>2</sub>Cl<sub>2</sub>, and to this solution was added 3 mL TFA. The mixture was stirred at r.t. for 1 h, and then concentrated under reduced pressure. The crude product was purified by HPLC under the following conditions to afford **19**, gGlu-2OMe SiR600, (22.9 mg, 0.0469 mmol) in 45.9 % yield. Gradient elution, A/B = 70/30 to 0/100 in 40 min (eluent A: H<sub>2</sub>O containing 0.1 % TFA, eluent B: 0.1 % TFA in 80 % acetonitrile and 20 % H<sub>2</sub>O). The identity of the product was confirmed by means of <sup>1</sup>H NMR and ESI-HRMS. <sup>1</sup>H NMR (300 MHz, CD<sub>3</sub>OD, isomer mixture):  $\delta$  8.22 (dd,  $J$  = 1.8 Hz, 7.7 Hz, 0.2H), 8.12 (d,  $J$  = 2.2 Hz, 0.85H), 7.82 (d,  $J$  = 2.2 Hz, 0.15H), 7.58-7.64 (m, 1.8H), 7.44-7.45 (m, 0.2H), 7.38-7.40 (m, 1.8H), 7.24 (d,  $J$  = 8.8 Hz, 1H), 7.11-7.15 (m, 3H), 6.76 (dd,  $J$  = 2.2 Hz, 9.5 Hz, 0.8H), 6.68 (d,  $J$  = 8.1 Hz, 0.2H), 4.02 (t,  $J$  = 6.6 Hz, 1H), 3.72 (s, 2.4H), 3.07 (s, 0.6H), 2.66-2.77 (m, 2H), 2.19-2.33 (m, 2H), 0.59 (s, 3H), 0.56 (s, 2.4H), 0.45 (s, 0.6H). ESI-HRMS (ESI +)  $m/z$  calcd. for [M+H]<sup>+</sup>, 488.20056; found, 488.19990.

## References

1. Urano, Y., *et al.* Rapid Cancer Detection by Topically Spraying a  $\gamma$ -Glutamyltranspeptidase-Activated Fluorescent Probe. *Science Translational Medicine* **3**, 110ra119-110ra119 (2011).
2. Komatsu, T., *et al.* Diced Electrophoresis Gel Assay for Screening Enzymes with Specified Activities. *Journal of the American Chemical Society* **135**, 6002-6005 (2013).
3. He, L., *et al.*  $\alpha$ -Mannosidase 2C1 attenuates PTEN function in prostate cancer cells. *Nature Communications* **2**, 307 (2011).
4. Asanuma, D., *et al.* Sensitive  $\beta$ -galactosidase-targeting fluorescence probe for visualizing small peritoneal metastatic tumours in vivo. *Nature Communications* **6**, 6463 (2015).
5. Wolf, S., Berrio, R.M. & Meier, C. Synthesis of Nonnatural Nucleoside Diphosphate Sugars. *European Journal of Organic Chemistry* **2011**, 6304-6313 (2011).
6. Mitchell, S.A., Pratt, M.R., Hruby, V.J. & Polt, R. Solid-Phase Synthesis of O-Linked Glycopeptide Analogues of Enkephalin. *The Journal of Organic Chemistry* **66**, 2327-2342 (2001).
7. Faust, T., Theurer, C., Eger, K. & Kreis, W. Synthesis of Uridine 5'-( $\beta$ -D-Fucopyranosyl Diphosphate) and (Digitoxigenin-3 $\beta$ -yl)- $\beta$ -D-Fucopyranoside and Enzymatic  $\beta$ -D-Fucosylation of Cardenolide Aglycones in *Digitalis lanata*. *Bioorganic Chemistry* **22**, 140-149 (1994).
8. Schmidt, R.R., Wegmann, B. & Jung, K.-H. Glycosyl imidates, 47. Stereospecific synthesis of  $\alpha$ - and  $\beta$ -L-fucopyranosyl phosphates and of gdp-fucose via trichloroacetimidate. *Liebigs Annalen der Chemie* **1991**, 121-124 (1991).
9. Boutureira, O., Bernardes, G.J.L., Fernández-González, M., Anthony, D.C. & Davis, B.G. Selenenylsulfide-Linked Homogeneous Glycopeptides and Glycoproteins: Synthesis of Human "Hepatic Se Metabolite A". *Angewandte Chemie International Edition* **51**, 1432-1436 (2012).
10. Doyle, L.M., *et al.* Stereoselective Epimerizations of Glycosyl Thiols. *Organic Letters* **19**, 5802-5805 (2017).
11. Matsuzaki, H., *et al.* Novel Hexosaminidase-Targeting Fluorescence Probe for Visualizing Human Colorectal Cancer. *Bioconjugate Chemistry* **27**, 973-981 (2016).
12. Boutureira, O., Bernardes, G.J.L., Fernández-González, M., Anthony, D.C. & Davis, B.G. Selenenylsulfide-Linked Homogeneous Glycopeptides and Glycoproteins: Synthesis of Human "Hepatic Se Metabolite A". *Angewandte Chemie International Edition* **51**, 1432-1436 (2012).
13. Ogasawara, A., *et al.* Red Fluorescence Probe Targeted to Dipeptidylpeptidase-IV for Highly Sensitive Detection of Esophageal Cancer. *Bioconjugate Chemistry* **30**, 1055-1060 (2019).
